# Supplementary material
Source: PubMed Central journal article supplement (PMC2912607)

# Synthesis of $\gamma$ -halogenated ketones via the Ce(IV)-mediated oxidative coupling of cyclobutanols and inorganic anions

Brian M. Casey, Cynthia A. Eakin, Robert A. Flowers II\*

Department of Chemistry, Lehigh University, Bethlehem, PA 18015, USA

## Supplemental Information

### 1. Synthesis of 1-Substituted-Cyclobutanols

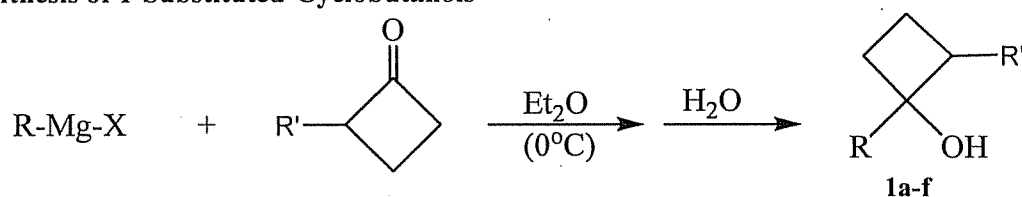

| Entry | R                            | R' | X  | Product | Yield (%) <sup>a</sup> |
|-------|------------------------------|----|----|---------|------------------------|
| 1     |                              | H  | Br | 1a      | 67                     |
| 2     |                              | H  | Br | 1b      | 39                     |
| 3     |                              | H  | Br | 1c      | 88                     |
| 4     |                              | H  | Cl | 1d      | 61                     |
| 5     | $\text{CH}_3(\text{CH}_2)_5$ | H  | Br | 1e      | 24                     |
| 6     |                              | Et | Br | 1f      | 85                     |

<sup>a</sup>Isolated yield

### 2. Characterization of Compounds

1-Phenyl-1-cyclobutanol (**1a**): <sup>1</sup>H-NMR (CDCl<sub>3</sub>, 500MHz) –  $\delta$  7.50 (m, 2H), 7.38-7.35 (m, 2H), 7.29-7.27 (m, 2H), 2.58-2.54 (m, 2H), 2.39-2.33 (m, 2H), 2.08-1.97 (m, 1H), 1.96 (s, 1H), 1.72-1.68 (m, 1H).  
<sup>13</sup>C-NMR (CDCl<sub>3</sub>, 125MHz) –  $\delta$  146.22, 128.45, 127.25, 124.93, 36.81, 12.99.

1-*p*-Methoxyphenyl-1-cyclobutanol (**1b**): <sup>1</sup>H-NMR (CDCl<sub>3</sub>, 500MHz) –  $\delta$  7.42 (m, 2H), 6.90-6.89 (m, 2H), 3.80 (s, 3H), 2.55-2.50 (m, 2H), 2.37-2.32 (m, 2H), 2.01-1.92 (m, 1H), 1.94 (s, 1H), 1.65-1.62 (m,

1H). <sup>13</sup>C-NMR (CDCl<sub>3</sub>, 125MHz) – δ 158.76, 126.34, 113.72, 109.31, 55.29, 36.84, 12.87. Bp 65-68°C (at <25mtorr).

1-*p*-Fluorophenyl-1-cyclobutanol (**1c**): <sup>1</sup>H-NMR (CDCl<sub>3</sub>, 500MHz) – δ 7.49-7.46 (m, 2H), 7.07-7.03 (m, 2H), 2.58-2.51 (m, 2H), 2.40-2.33 (m, 2H), 2.05-1.97(m, 1H), 2.01 (s, 1H), 1.72-1.63 (m, 1H). <sup>13</sup>C-NMR (CDCl<sub>3</sub>, 125MHz) – δ 161.96 (d), 142.04 (d), 126.78 (d), 115.13 (d), 37.01, 12.87.

1-Cyclohexyl-1-cyclobutanol (**1d**): <sup>1</sup>H-NMR (CDCl<sub>3</sub>, 500MHz) – δ 2.15-2.12 (m, 2H), 1.90-1.65 (m, 8H), 1.59-1.49 (m, 1H), 1.45 (s, 1H), 1.41-1.36 (m, 1H), 1.27-1.09 (m, 3H), 1.06-0.94 (m, 2H). <sup>13</sup>C-NMR (CDCl<sub>3</sub>, 125MHz) – δ 78.02, 45.48, 33.85, 26.47, 26.44, 25.58, 12.36. Bp 34-35°C (at <70mtorr).

1-Hexyl-1-cyclobutanol (**1e**): <sup>1</sup>H-NMR (CDCl<sub>3</sub>, 500MHz) – δ 2.05-1.92 (m, 4H), 1.76-1.68 (m, 1H), 1.57 (t, 3H, *J* = 6.75Hz), 1.54-1.44 (m, 1H), 1.35-1.26 (m, 8H), 1.24 (s, 1H), 0.87 (t, 3H, *J* = 6.73Hz). <sup>13</sup>C-NMR (CDCl<sub>3</sub>, 125MHz) – δ 75.40, 39.54, 35.91, 31.88, 29.70, 23.33, 22.62, 14.0008, 12.11. Bp 33-35°C (at <50mtorr).

2-Ethyl-1-*p*-fluorophenyl-1-cyclobutanol (**1f**): <sup>1</sup>H-NMR (CDCl<sub>3</sub>, 500MHz) – δ 7.48-7.40 (m, 2H), 7.07-7.01 (m, 2H), 2.55-2.51 (m, 1H), 2.40-2.38 (m, 1H), 2.19-2.14 (m, 1H), 2.00-1.97 (m, 1H), 1.82-1.78 (m, 1H), 1.80 (s, 1H), 1.69-1.51 (m, 2H), 0.90-0.86 (t, 3H, *J* = 7.44 Hz). <sup>13</sup>C-NMR (CDCl<sub>3</sub>, 125MHz) – δ 161.78 (d), 143.12 (d), 126.54 (d), 114.98 (d), 78.29, 47.59, 34.31, 22.33, 21.32, 11.38.

4-Iodo-1-phenyl-1-butanone (**2a**): <sup>1</sup>H-NMR (CDCl<sub>3</sub>, 500MHz) – δ 7.97-7.96 (m, 2H), 7.58-7.7.54 (m, 1H), 7.48-7.45 (m, 2H), 3.32 (t, 2H, *J* = 6.70 Hz), 3.12 (t, 2H, *J* = 6.97 Hz), 2.25 (quin, 2H, *J* = 6.83Hz). <sup>13</sup>C-NMR (CDCl<sub>3</sub>, 125MHz) – δ 198.62, 136.72, 133.24, 128.66, 128.02, 38.92, 27.52, 6.78.

4-Iodo-1-*p*-methoxyphenyl-1-butanone (**2b**): <sup>1</sup>H-NMR (CDCl<sub>3</sub>, 500MHz) – δ 7.96-7.93 (m, 2H), 6.94-6.92 (m, 2H), 3.87 (s, 3H), 3.31 (t, 2H, *J* = 6.65 Hz), 3.07 (t, 2H, *J* = 7.04), 2.23 (quin, 2H, *J* = 6.84 Hz). <sup>13</sup>C-NMR (CDCl<sub>3</sub>, 125MHz) – δ 197.16, 163.55, 130.28, 129.81, 113.76, 55.47, 38.52, 27.72, 7.02.

1-*p*-Fluorophenyl-4-iodo-1-butanone (**2c**): <sup>1</sup>H-NMR (CDCl<sub>3</sub>, 500MHz) – δ 8.03-7.97 (m, 2H), 7.18-7.11 (m, 2H), 3.35-3.29 (t, 2H, *J* = 6.66 Hz), 3.13-3.08 (t, 2H, *J* = 7.01 Hz), 2.29-2.20 (quin, 2H, *J* = 6.84 Hz). <sup>13</sup>C-NMR (CDCl<sub>3</sub>, 125MHz) – δ 196.93, 165.76 (d), 133.11 (d), 130.62 (d), 115.72 (d), 38.78, 27.39, 6.71.

1-Cyclohexyl-4-iodo-1-butanone (**2d**): <sup>1</sup>H-NMR (CDCl<sub>3</sub>, 500MHz) – δ 3.20 (t, 2H, *J* = 6.61 Hz), 2.57 (t, 2H, *J* = 7.00 Hz), 2.34-2.30 (m, 1H), 2.04 (quin, 2H, *J* = 6.74 Hz), 1.86-1.62 (m, 5H), 1.36-1.13 (m, 5H). <sup>13</sup>C-NMR (CDCl<sub>3</sub>, 125MHz) – δ 212.63, 50.96, 40.72, 28.48, 26.97, 25.80, 25.63, 6.97. HR-MS (FAB+): *m/z* 281.0397 (M+H)<sup>+</sup> for C<sub>10</sub>H<sub>18</sub>OI: Calcd. 281.04.

1-Iodo-4-decanone (**2e**): <sup>1</sup>H-NMR (CDCl<sub>3</sub>, 500MHz) – δ 3.21 (t, 2H, *J* = 6.56 Hz), 2.54 (t, 2H, *J* = 6.91 Hz), 2.39 (t, 2H, *J* = 7.44 Hz), 2.05 (quin, 2H, *J* = 6.73 Hz), 1.58-1.52 (m, 2H), 1.30-1.24 (m, 6H), 0.87 (t, 3H, *J* = 6.91 Hz). <sup>13</sup>C-NMR (CDCl<sub>3</sub>, 125MHz) – δ 209.76, 43.07, 42.79, 31.56, 28.87, 27.02, 23.81, 22.47, 14.02, 6.71.

2-Ethyl-1-*p*-fluorophenyl-4-iodo-1-butanone (**2c**): <sup>1</sup>H-NMR (CDCl<sub>3</sub>, 500MHz) – δ 8.05-8.00 (m, 2H), 7.18-7.13 (m, 2H), 4.20-4.16 (m, 1H), 3.26-3.14 (m, 2H), 2.22-2.17 (m, 2H), 1.97-1.82 (m, 2H), 1.10-1.06 (t, 3H, *J* = 7.22 Hz). <sup>13</sup>C-NMR (CDCl<sub>3</sub>, 125MHz) – δ 197.38, 165.78 (d), 133.15 (d), 130.66 (d), 115.71 (d), 41.66, 38.72, 34.25, 34.15, 14.12.

4-Bromo-1-phenyl-1-butanone (**3a**):  $^1\text{H-NMR}$  ( $\text{CDCl}_3$ , 500MHz) –  $\delta$  7.98-7.96 (m, 2H), 7.58-7.55 (m, 1H), 7.48-7.45 (m, 2H), 3.54 (t, 2H,  $J = 6.27$  Hz), 3.18 (t, 2H,  $J = 6.86$  Hz), 2.30 (quin, 2H,  $J = 6.64$  Hz).  $^{13}\text{C-NMR}$  ( $\text{CDCl}_3$ , 125MHz) –  $\delta$  198.81, 136.71, 133.24, 128.65, 128.01, 36.54, 33.64, 26.83.

4-Bromo-1-*p*-methoxyphenyl-1-butanone (**3b**):  $^1\text{H-NMR}$  ( $\text{CDCl}_3$ , 500MHz) –  $\delta$  7.96-7.95 (m, 2H), 6.94-6.91 (m, 2H), 3.86 (s, 1H), 3.53 (t, 2H,  $J = 6.35$  Hz), 3.12 (t, 2H,  $J = 6.96$  Hz), 2.29 (quin, 2H,  $J = 6.60$  Hz).  $^{13}\text{C-NMR}$  ( $\text{CDCl}_3$ , 125MHz) –  $\delta$  197.31, 163.52, 130.24, 129.79, 113.72, 55.44, 36.12, 33.76, 27.01.

4-Bromo-1-*p*-fluorophenyl-1-butanone (**3c**):  $^1\text{H-NMR}$  ( $\text{CDCl}_3$ , 500MHz) –  $\delta$  8.03-7.98 (m, 2H), 7.17-7.11 (m, 2H), 3.57-3.53 (t, 2H,  $J = 6.33$  Hz), 3.18-3.13 (t, 2H,  $J = 6.97$  Hz), 2.33-2.26 (quin, 2H,  $J = 6.58$  Hz).  $^{13}\text{C-NMR}$  ( $\text{CDCl}_3$ , 125MHz) –  $\delta$  197.13, 165.77 (d), 133.12 (d), 130.62 (d), 115.72 (d), 36.41, 33.53, 26.74.

### 3. Spectral Data for 1a-f, 2a-f and 3a-c

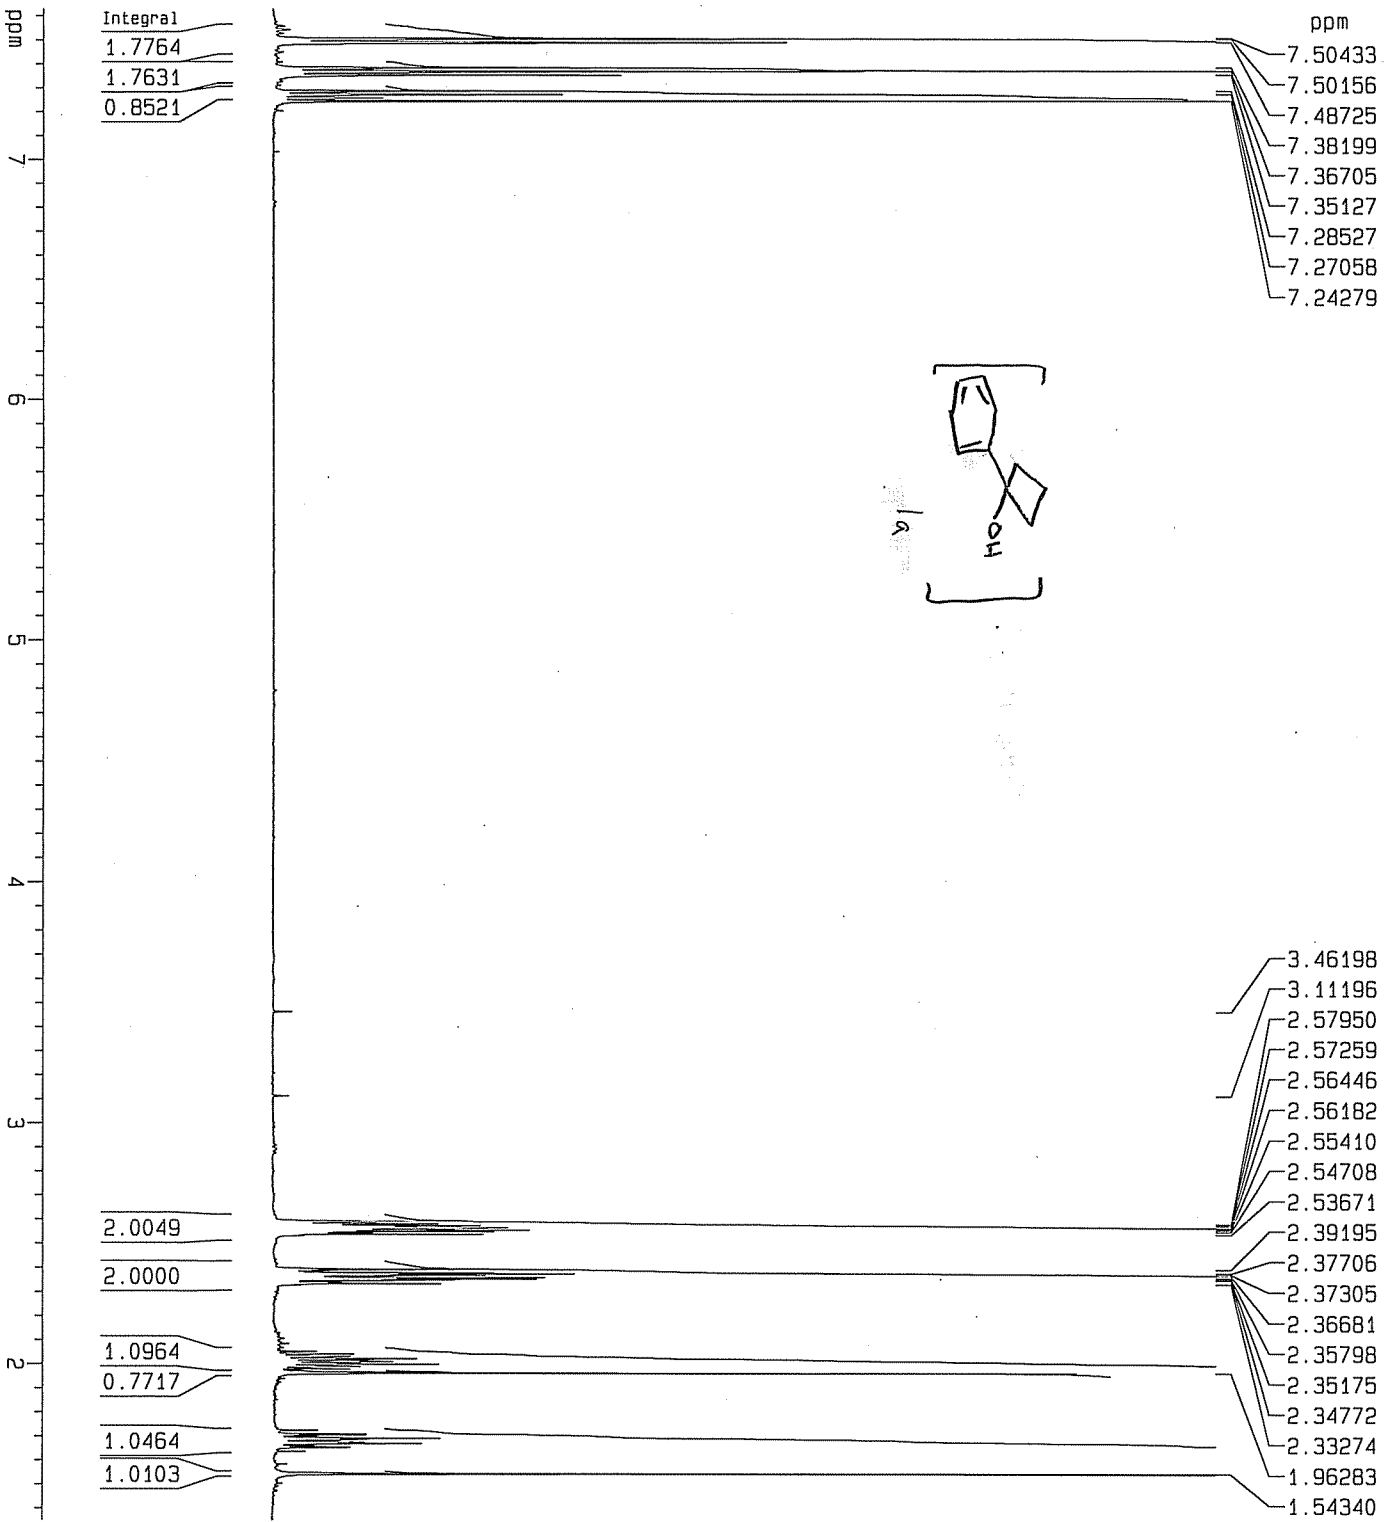

Current Data Parameters  
 NAME PhCycButol1-050908  
 EXPNO 1  
 PROCNO 1

F2 - Acquisition Parameters:  
 Date\_ 20080509  
 Time 15.21  
 INSTRUM spect  
 PROBHD 5 mm PHB80 BB-  
 PULPROG zg  
 TD 32768  
 SOLVENT CDCl3  
 NS 10  
 DS 0  
 SWH 7507.507 Hz  
 FIDRES 0.229111 Hz  
 AQ 2.1824653 sec  
 RG 322.5  
 DW 66.600 usec  
 DE 7.00 usec  
 TE 295.9 K  
 D1 1.00000000 sec  
 MCREST 0.00000000 sec  
 MCWPK 0.01500000 sec

==== CHANNEL f1 =====  
 NUC1 1H  
 P1 6.00 usec  
 PL1 -4.00 dB  
 SF01 500.1323989 MHz

F2 - Processing parameters  
 SI 32768  
 SF 500.1300225 MHz  
 WDM EM  
 SSB 0  
 LB 0.20 Hz  
 GB 0  
 PC 4.00

1D NMR plot parameters  
 CX 20.00 cm  
 CY 0.00 cm  
 F1P 7.628 ppr  
 F1 3814.76 Hz  
 F2P 1.350 ppr  
 F2 .674.94 Hz  
 PPMCM 0.31390 ppr  
 HZCM 156.99112 Hz

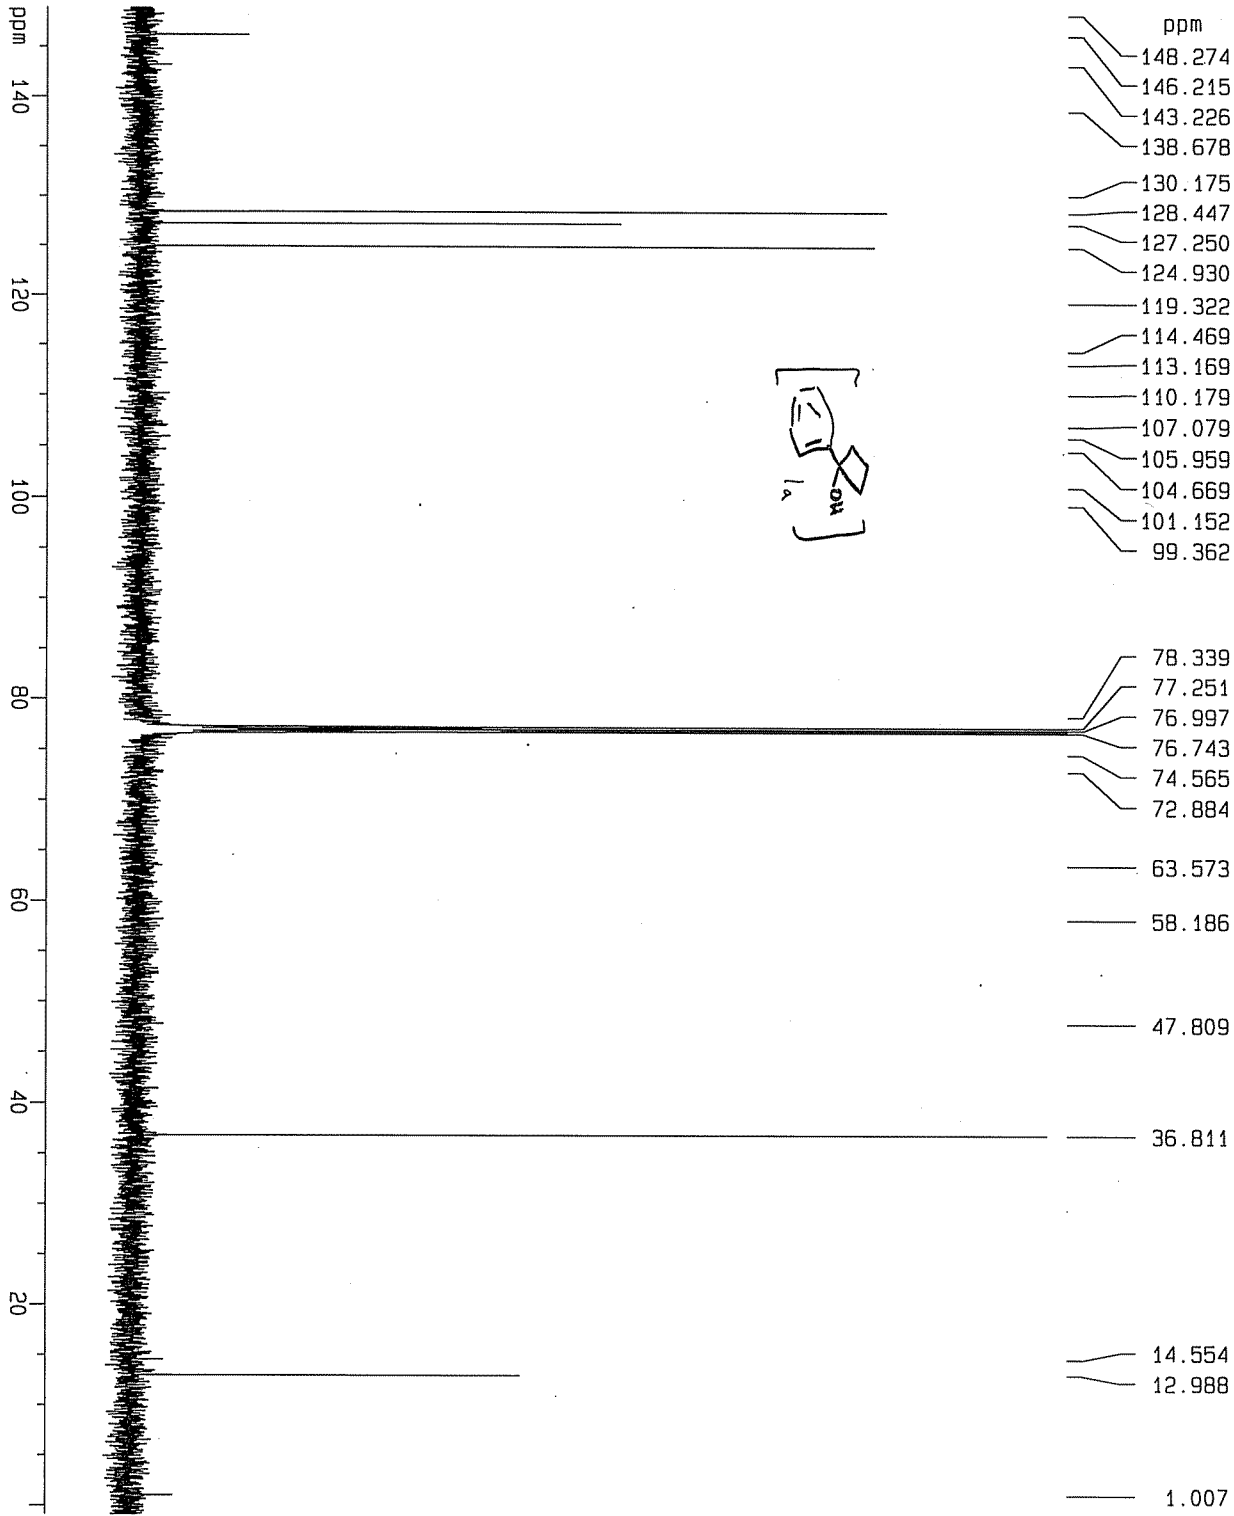

Current Data Parameters  
 NAME PhCycButol-050908  
 EXPNO 2  
 PROCNO 1

F2 - Acquisition Parameters  
 Date\_ 20080509  
 Time 15.29

INSTRUM spect  
 PROBHD 5 mm PH80 B8-  
 PULPROG zgpg

TD 65536  
 SOLVENT CDCl3  
 NS 1501  
 DS 0

SWH 30030.029 Hz  
 FIDRES 0.458222 Hz  
 AQ 1.0912410 sec

RG 1024  
 DW 16.650 usec  
 DE 7.00 usec

TE 296.3 K  
 D1 2.00000000 sec  
 d11 0.03000000 sec

MCREST 0.00000000 sec  
 MCNRK 0.01500000 sec

==== CHANNEL f1 =====  
 NUC1 13C  
 P1 5.00 usec  
 PL1 -1.00 dB

SF01 125.7715390 MHz

==== CHANNEL f2 =====  
 CPDPRG2 waltz16  
 NUC2 1H

PCPD2 110.00 usec  
 PL2 17.50 dB  
 PL12 17.00 dB

SF02 500.1325000 MHz

F2 - Processing Parameters  
 SI 65536  
 SF 125.7577931 MHz

WDW EM  
 SSB 0  
 LB 1.00 Hz  
 GB 0  
 PC 1.40

1D NMR plot parameters  
 CX 20.00 cm  
 CY 12.50 cm

F1P 148.918 ppm  
 F1 18727.56 Hz  
 F2P -0.886 ppm  
 F2 -111.38 Hz

PPMCK 7.49016 ppm/cm  
 HZCK 941.94659 Hz/cm

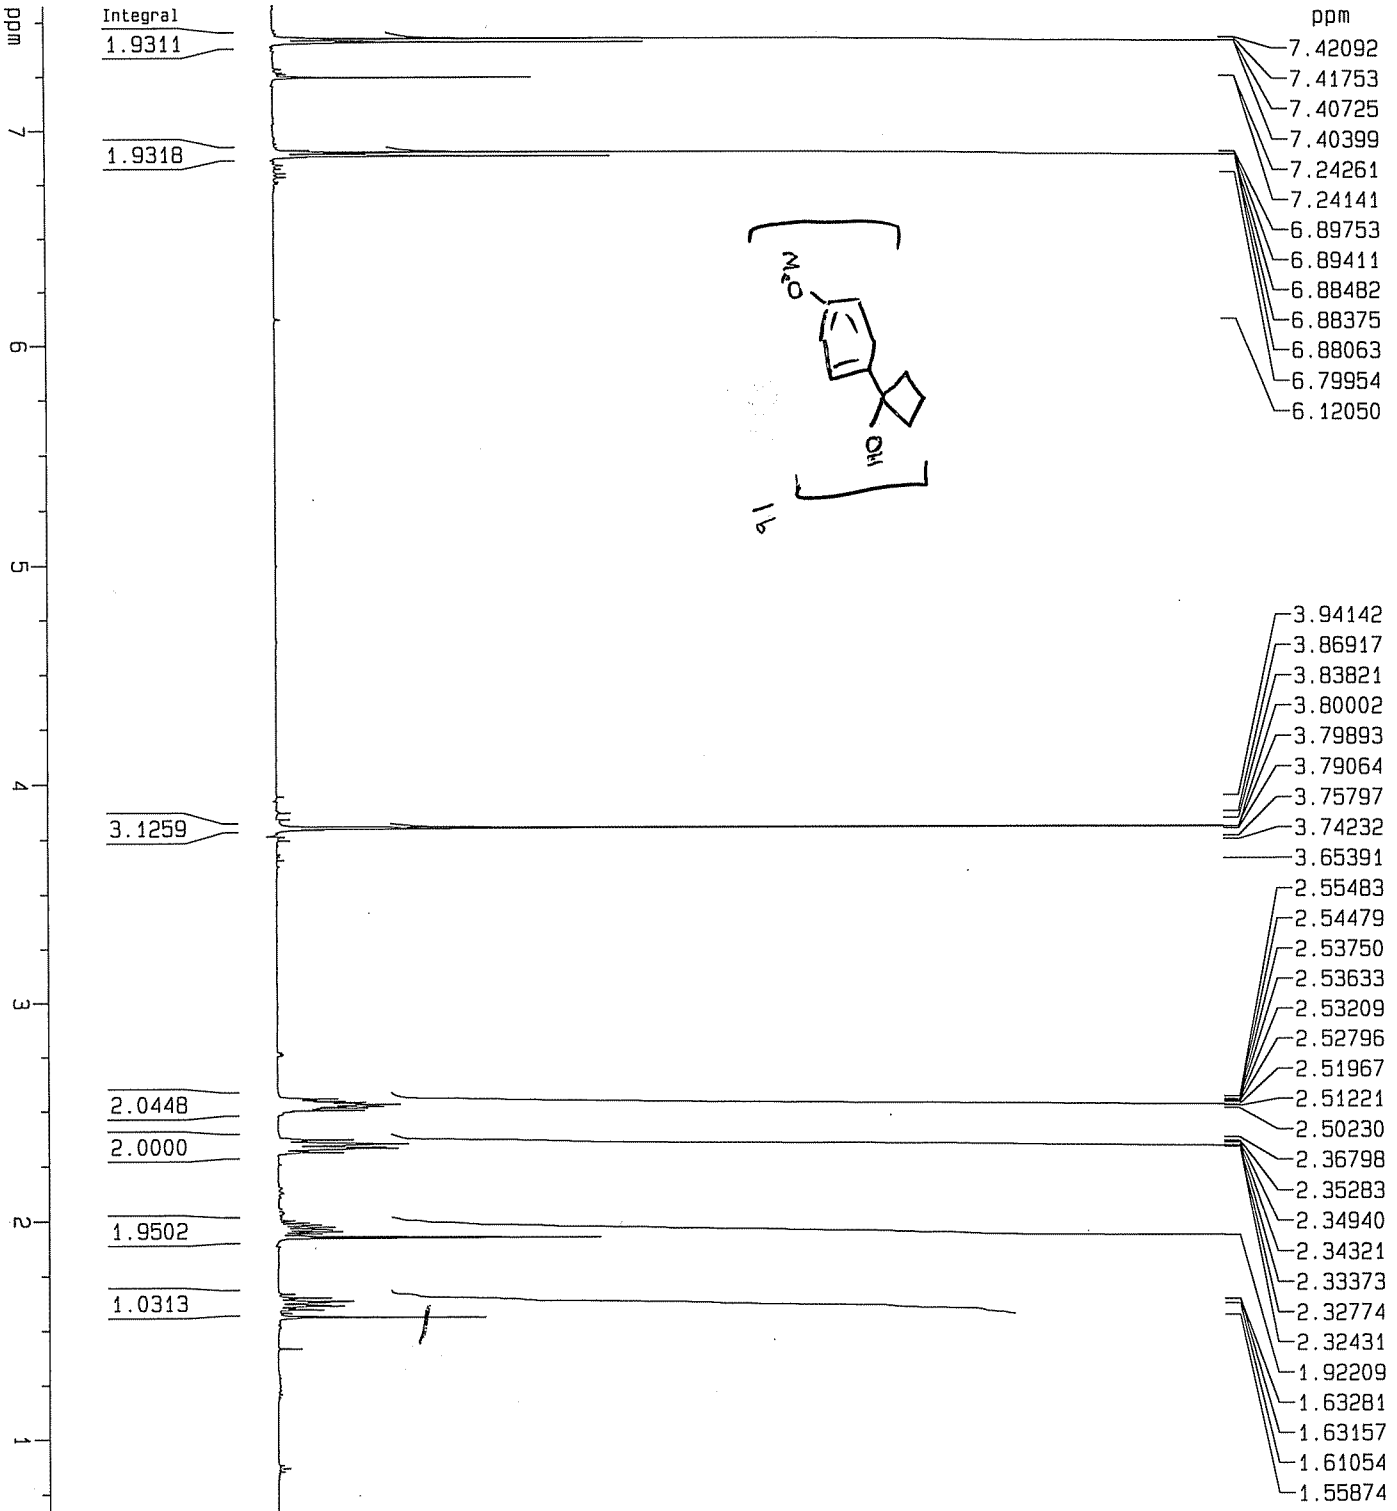

Current Data Parameters  
 NAME MeOPhCYBut01-052908  
 EXPNO 2  
 PROCNO 1

F2 - Acquisition Parameters  
 Date\_ 20080529  
 Time 8.15

INSTRUM spect  
 PROBHD 5 mm TXI 1H/2H  
 PULPROG zg30  
 TD 32768  
 SOLVENT CDCl3  
 NS 8  
 DS 0

SMH 7507.507 Hz  
 FIDRES 0.229111 Hz  
 AQ 2.1824653 sec  
 RG 322.5  
 DW 66.600 usec  
 DE 7.00 usec  
 TE 295.0 K

D1 1.00000000 sec  
 MCREST 0.00000000 sec  
 MCWIRK 0.01500000 sec

===== CHANNEL f1 =====

NUC1 1H  
 P1 8.30 usec  
 PL1 1.00 dB  
 SF01 500.1323989 MHz

F2 - Processing parameters

SI 32768  
 SF 500.1300225 MHz  
 WDW EM  
 SSB 0  
 LB 0.20 Hz  
 GB 0  
 PC 4.00

1D NMR plot parameters

CX 20.00 cm  
 CY 0.00 cm  
 F1P 7.575 ppm  
 F1 3788.45 Hz  
 F2P 0.666 ppm  
 F2 332.89 Hz  
 PPMCM 0.34547 ppm/  
 HZCM 172.77794 Hz/ci

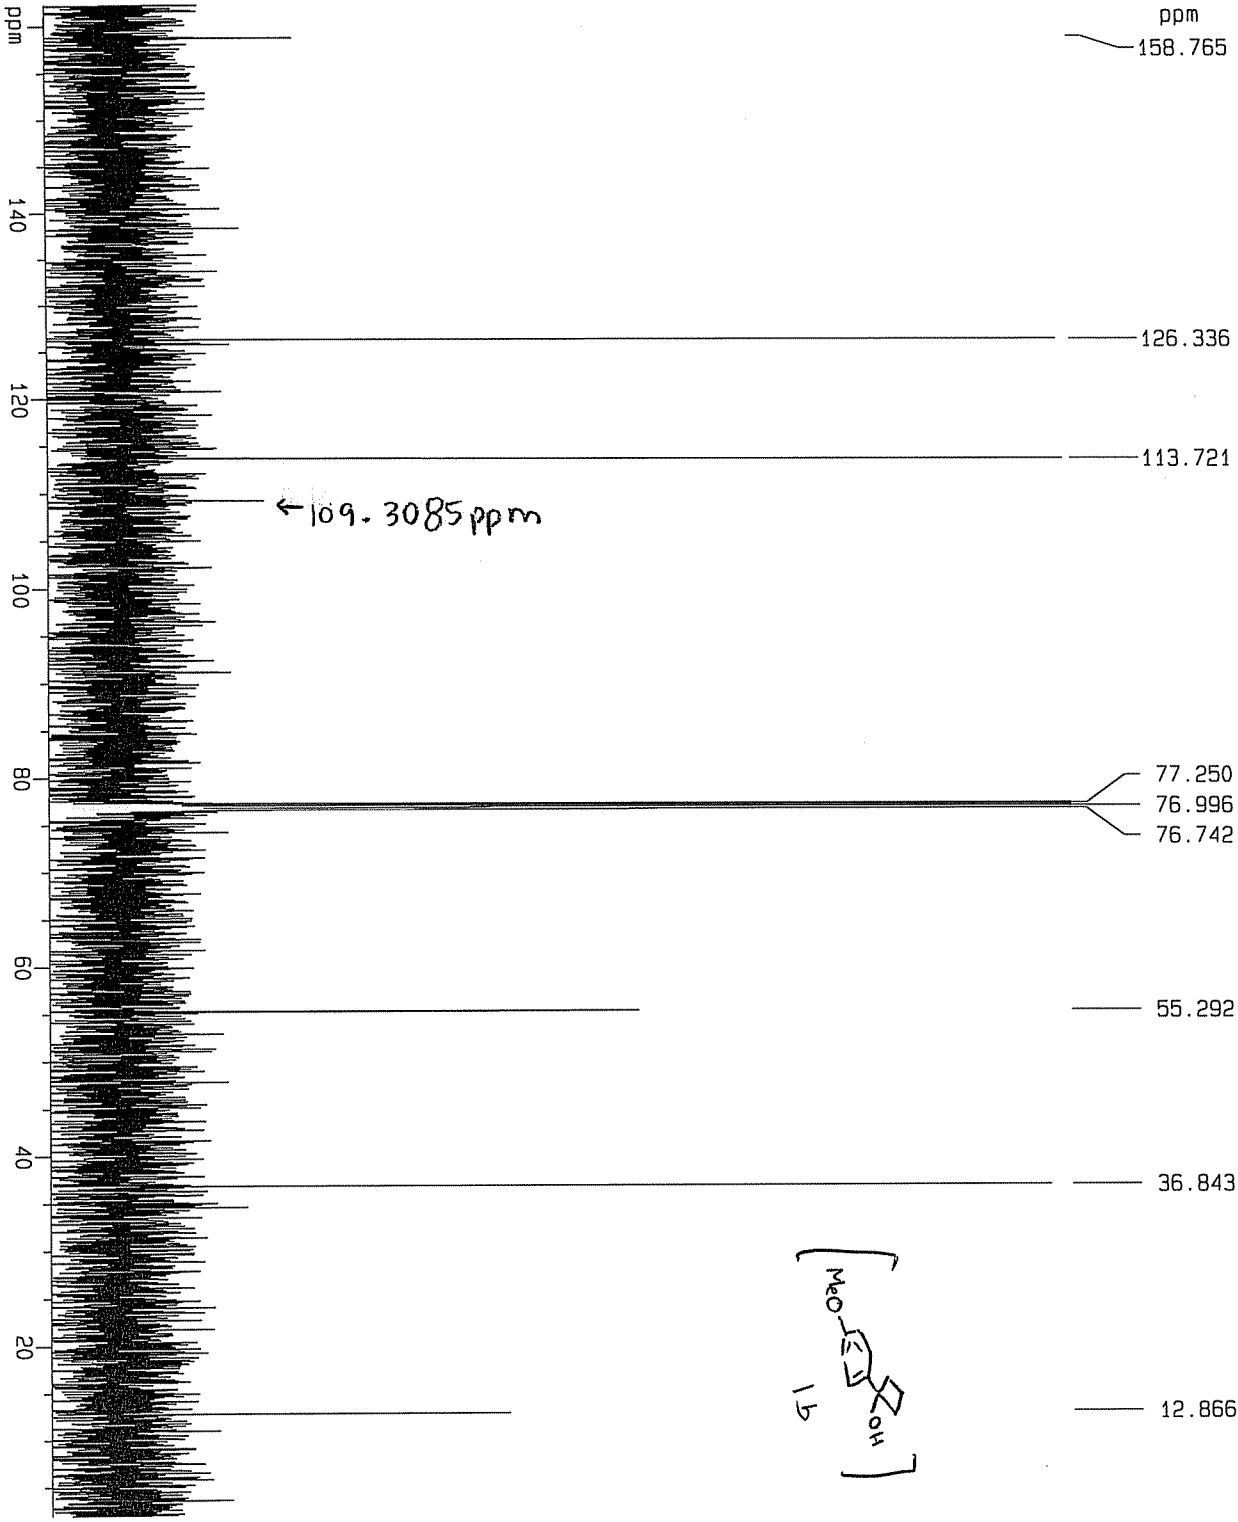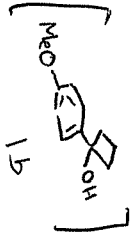

Current Data Parameters  
 NAME pMeOphcYbut01-052108  
 EXPNO 5  
 PROCNO 1

F2 - Acquisition Parameters  
 Date\_ 20080522  
 Time 15.36

INSTRUM spect  
 PROBD 5 mm PABBO BB-  
 PULPROG zgpg

TD 65536  
 SOLVENT CDCl3  
 NS 531  
 DS 0

SWH 30030.029 Hz  
 FIDRES 0.458222 Hz  
 AQ 1.0912410 sec

RG 7298.2  
 DW 16.650 usec  
 DE 7.00 usec

TE 296.3 K  
 D1 2.00000000 sec  
 d11 0.03000000 sec

MCREST 0.00000000 sec  
 MCWRR 0.01500000 sec

==== CHANNEL f1 =====  
 NUC1 13C  
 P1 5.00 usec  
 PL1 -1.00 dB  
 SF01 125.7715390 MHz

==== CHANNEL f2 =====  
 CPDPRG2 waltz16  
 NUC2 1H  
 PCPD2 110.00 usec  
 PL2 17.50 dB  
 PL12 17.00 dB  
 SF02 500.1325000 MHz

F2 - Processing parameters  
 SI 65536  
 SF 125.7577931 MHz  
 WDW EM  
 SSB 0  
 LB 1.00 Hz  
 GB 0  
 PC 1.40

1D NMR plot parameters  
 CX 20.00 cm  
 CY 12.50 cm  
 F1P 162.308 ppm  
 F1 20411.49 Hz  
 F2P 1.904 ppm  
 F2 239.45 Hz  
 PPMCM 8.02020 ppm/cm  
 HZCM 1008.60199 Hz/cm



Crude

7.48  
7.48  
7.47  
7.46  
7.07  
7.05  
7.04

2.54  
2.53  
2.53  
2.52  
2.38  
2.36  
2.36  
2.05  
2.04  
2.04  
2.03  
2.01  
2.01  
2.01  
2.00  
1.98  
1.71  
1.71  
1.70

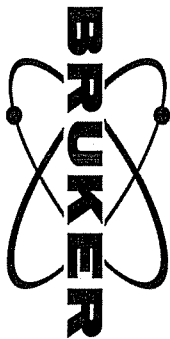

Current Data Parameters  
NAME pf-ph-CyButol1-090408  
EXPNO 1  
PROCNO 1

F2 - Acquisition Parameters  
Date\_ 20080904  
Time 17.05  
INSTRUM spect  
PROBHD 5 mm BBO BB-1H  
PULPROG zg30  
TD 32768  
SOLVENT CDCl3  
NS 6  
DS 0  
SWH 6009.615 Hz  
FIDRES 0.183399 Hz  
AQ 2.7264309 sec  
RG 256  
DW 83.200 usec  
DE 6.00 usec  
TE 296.1 K  
D1 1.00000000 sec  
TD0 1

==== CHANNEL f1 =====  
NUC1 1H  
P1 7.35 usec  
PL1 1.00 dB  
SFO1 500.1327510 MHz  
F2 - Processing parameters  
SI 32768  
SF 500.1300102 MHz  
WDW EM  
SSB 0  
IB 0.30 Hz  
GB 0  
PC 1.00

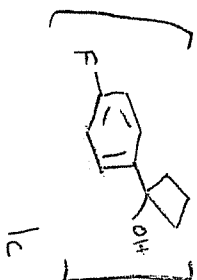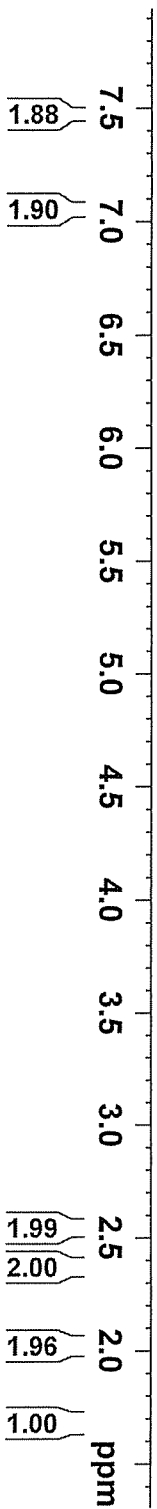

Crude

162.94  
 160.99  
 142.05  
 142.02  
 126.81  
 126.75  
 115.21  
 115.04

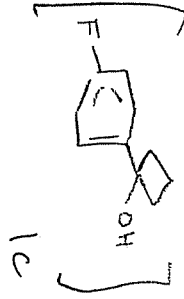

37.01  
 12.87

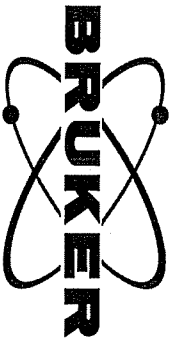

Current Data Parameters  
 NAME pf-Pn-CyButOl-090408  
 EXPNO 2  
 PROCNO 1

F2 - Acquisition Parameters  
 Date\_ 20080904  
 Time 17.31  
 INSTRUM spect  
 PROBHD 5 mm BBO BB-1H  
 PULPROG zgpg30  
 TD 65536  
 SOLVENT CDCl3  
 NS 303  
 DS 4  
 SWH 30030.029 Hz  
 FIDRES 0.458222 Hz  
 AQ 1.0912410 sec  
 RG 6502  
 DW 16.650 usec  
 DE 7.00 usec  
 TE 296.9 K  
 D1 1.00000000 sec  
 d11 0.03000000 sec  
 TD0 1

===== CHANNEL f1 =====  
 NUC1 13C  
 P1 5.00 usec  
 PL1 1.00 dB  
 SFO1 125.7703640 MHz  
 ===== CHANNEL f2 =====  
 CPDPRG2 waltz16  
 NUC2 1H  
 PCPD2 90.00 usec  
 PL2 24.00 dB  
 PL12 24.00 dB  
 SFO2 500.1322150 MHz  
 F2 - Processing parameters  
 SI 32768  
 SF 125.7577929 MHz  
 WDW EM  
 SSB 0  
 IB 1.00 Hz  
 GB 0  
 PC 1.40

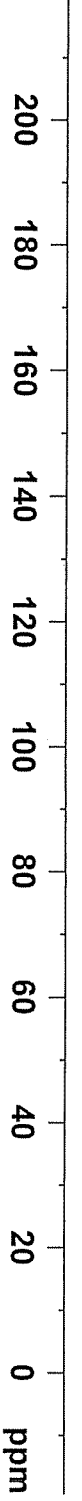

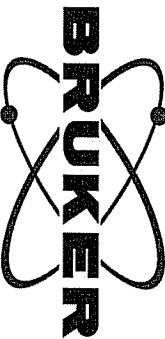

CYHexCyButol-0522208

- 2.15
- 2.14
- 2.14
- 2.13
- 2.12
- 2.12
- 2.11
- 2.11
- 2.10
- 1.92
- 1.90
- 1.88
- 1.87
- 1.86
- 1.84
- 1.83
- 1.82
- 1.81
- 1.80
- 1.79
- 1.78
- 1.73
- 1.71
- 1.68
- 1.65
- 1.56
- 1.53
- 1.52
- 1.50
- 1.50
- 1.48
- 1.47
- 1.46
- 1.46

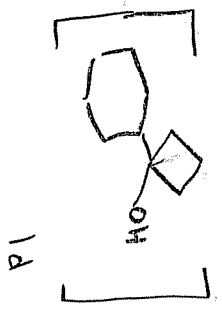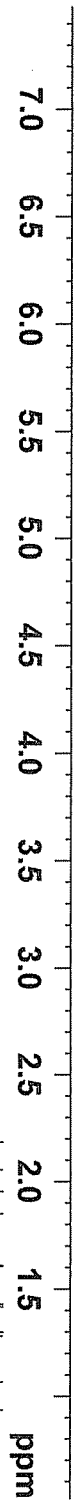

- 2.00
- 1.85
- 5.99
- 1.86
- 0.89
- 3.06
- 1.96

```

NAME      CYHexCyButol-0522208
EXPNO     2
PROCNO    1
Date_     20080522
Time      13.54
INSTRUM   spect
PROBHD    5 mm PHBBO BB-
PULPROG   zg
TD         32768
SOLVENT   CDCl3
NS         10
DS         0
SWH        7507.507 Hz
FIDRES     0.229111 Hz
AQ         2.1824653 sec
RG         181
DE         66.600 usec
TE         295.7 K
D1         1.00000000 sec
MCREST    0.00000000 sec
MCWRK     0.01500000 sec

===== CHANNEL f1 =====
NUC1      1H
P1        6.00 usec
PL1       -4.00 dB
SFO1     500.1323989 MHz
SI        32768
SF        500.1300225 MHz
WDW       EM
SSB       0
LB        0.20 Hz
GB        0
PC        4.00
  
```

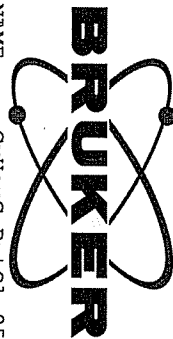

CYHexCyBut01-052208

NAME  
 EXPNO 3  
 PROCNO 1  
 Date\_ 20080522  
 Time 13.59  
 INSTRUM spect  
 PROBHD 5 mm PHBBO BB-  
 PULPROG zgpg  
 TD 65536  
 SOLVENT CDCl3  
 NS 533  
 DS 0  
 SWH 30030.029 Hz  
 FIDRES 0.458222 Hz  
 AQ 1.0912410 sec  
 RG 13004  
 DW 16.650 usec  
 DE 7.00 usec  
 TE 296.3 K  
 D1 2.00000000 sec  
 d11 0.03000000 sec  
 MCREST 0.00000000 sec  
 MCWRK 0.01500000 sec

==== CHANNEL F1 =====  
 NUC1 13C  
 P1 5.00 usec  
 PL1 -1.00 dB  
 SFO1 125.7715390 MHz  
 ===== CHANNEL F2 =====  
 CPDPRG2 waltz16  
 NUC2 1H  
 PCPD2 110.00 usec  
 PL2 17.50 dB  
 PL12 17.00 dB  
 SFO2 500.1325000 MHz  
 SI 65536  
 SF 125.7577931 MHz  
 WDW EM  
 SSB 0  
 LB 1.00 Hz  
 GB 0  
 PC 1.40

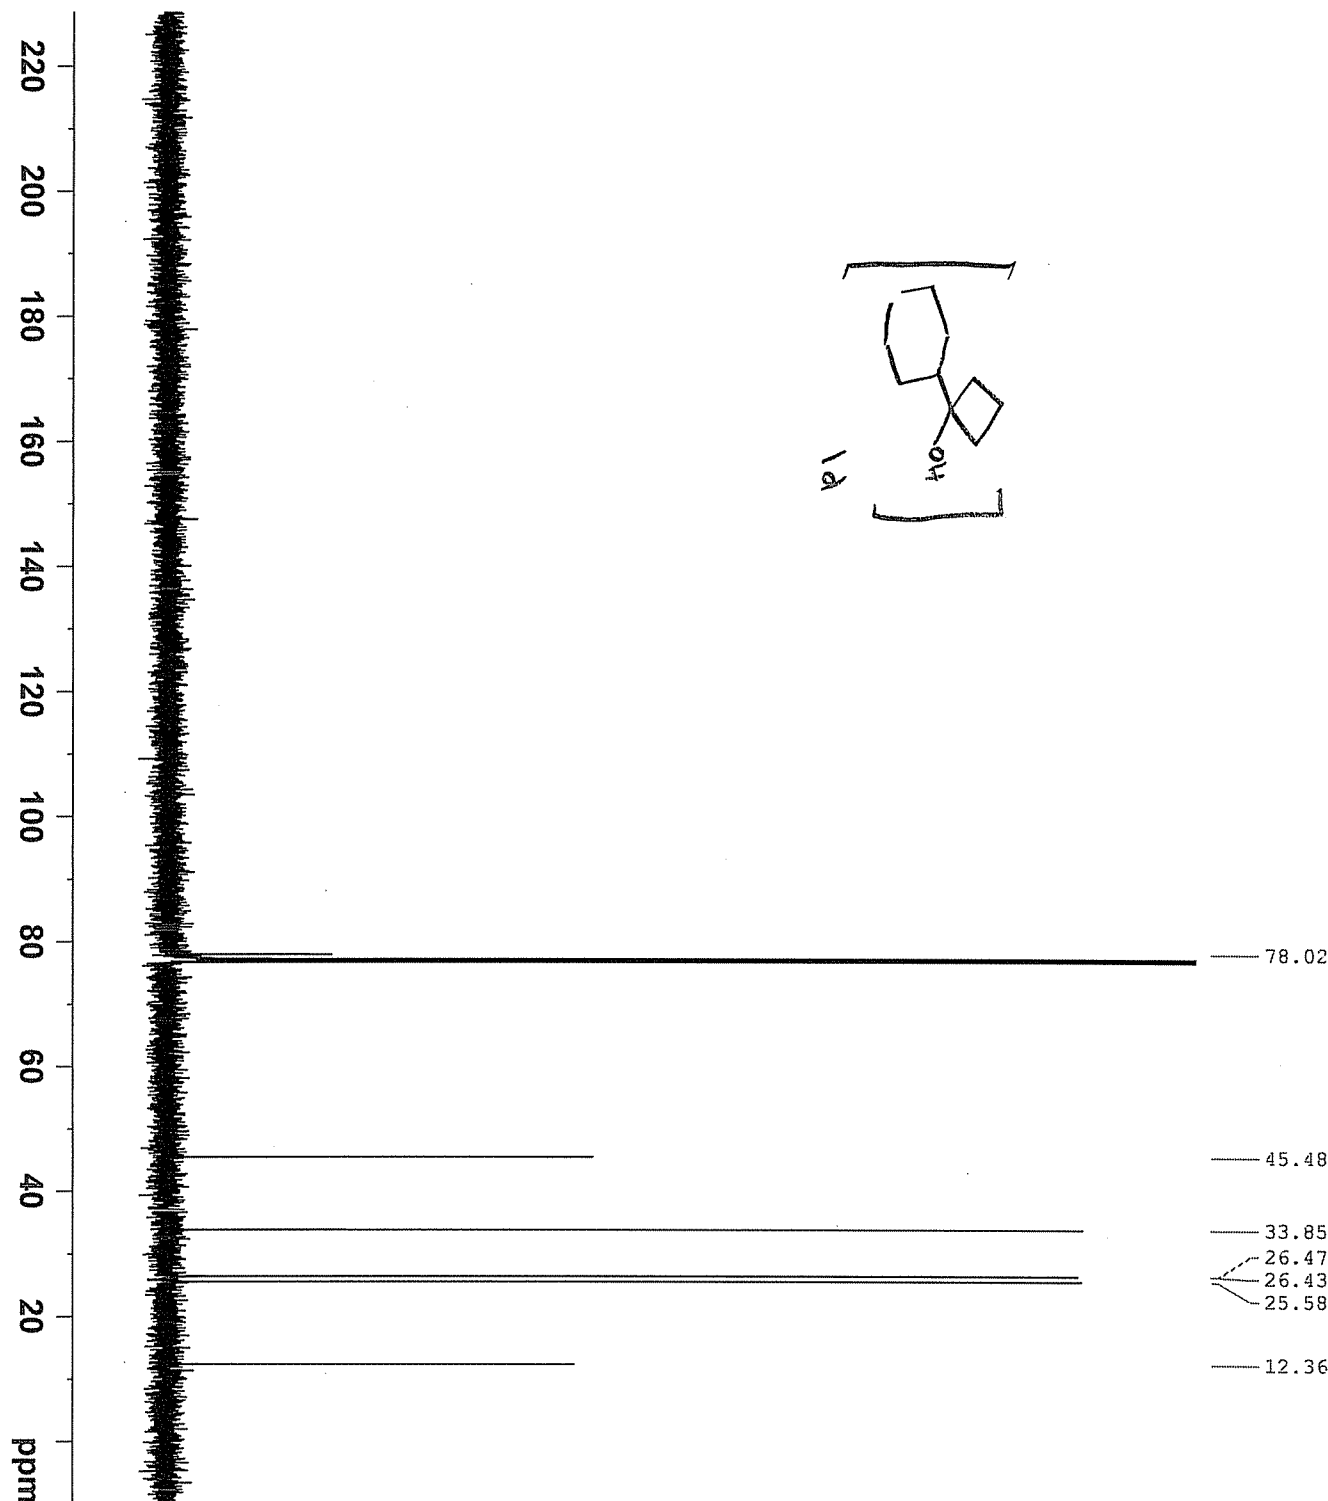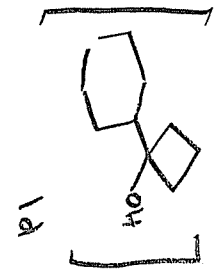

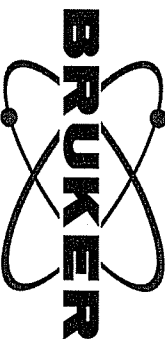

NAME HexButol1-052608

EXPNO 1  
 PROCNO 1  
 Date\_ 20080526  
 Time 11.02  
 INSTRUM spect  
 PROBHD 5 mm TXI 1H/2H  
 PULPROG zg  
 TD 32768  
 SOLVENT CDCl3  
 NS 10  
 DS 0  
 SWH 7507.507 Hz  
 FIDRES 0.229111 Hz  
 AQ 2.1824653 sec  
 RG 161.3  
 DW 66.600 usec  
 DE 7.00 usec  
 TE 294.8 K  
 D1 1.00000000 sec  
 MCREST 0.00000000 sec  
 MCWRR 0.01500000 sec

===== CHANNEL F1 =====  
 NUC1 1H  
 P1 2.00 usec  
 PL1 1.00 dB  
 SFO1 500.1323989 MHz  
 SI 32768  
 SF 500.1300225 MHz  
 WDW EM  
 SSB 0  
 LB 0.20 Hz  
 GB 0  
 PC 4.00

2.04  
2.04  
2.03  
2.03  
2.02  
2.02  
2.01  
2.01  
2.01  
2.00  
1.99  
1.97  
1.97  
1.96  
1.95  
1.73  
1.73  
1.71  
1.58  
1.57  
1.55  
1.52  
1.50  
1.49  
1.48  
1.48  
1.46  
1.46  
1.35  
1.34  
1.33  
1.31  
1.30

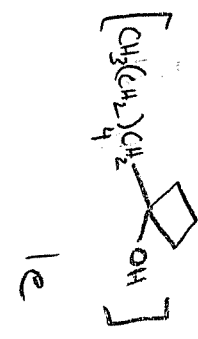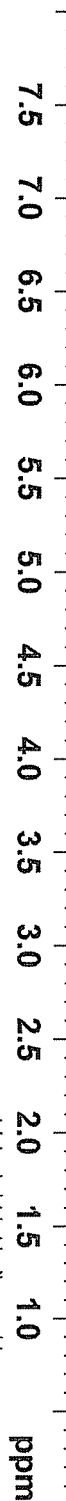

1.93  
2.03  
1.00  
3.07  
1.07  
8.04  
0.41  
3.10

ppm

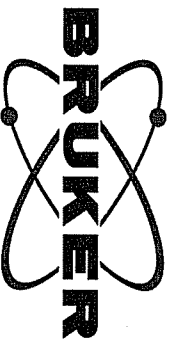

39.54  
 35.92  
 31.88  
 29.69  
 23.33  
 22.61  
 14.08  
 12.10

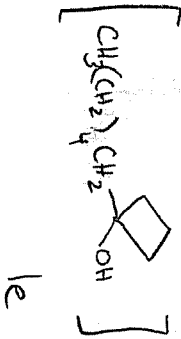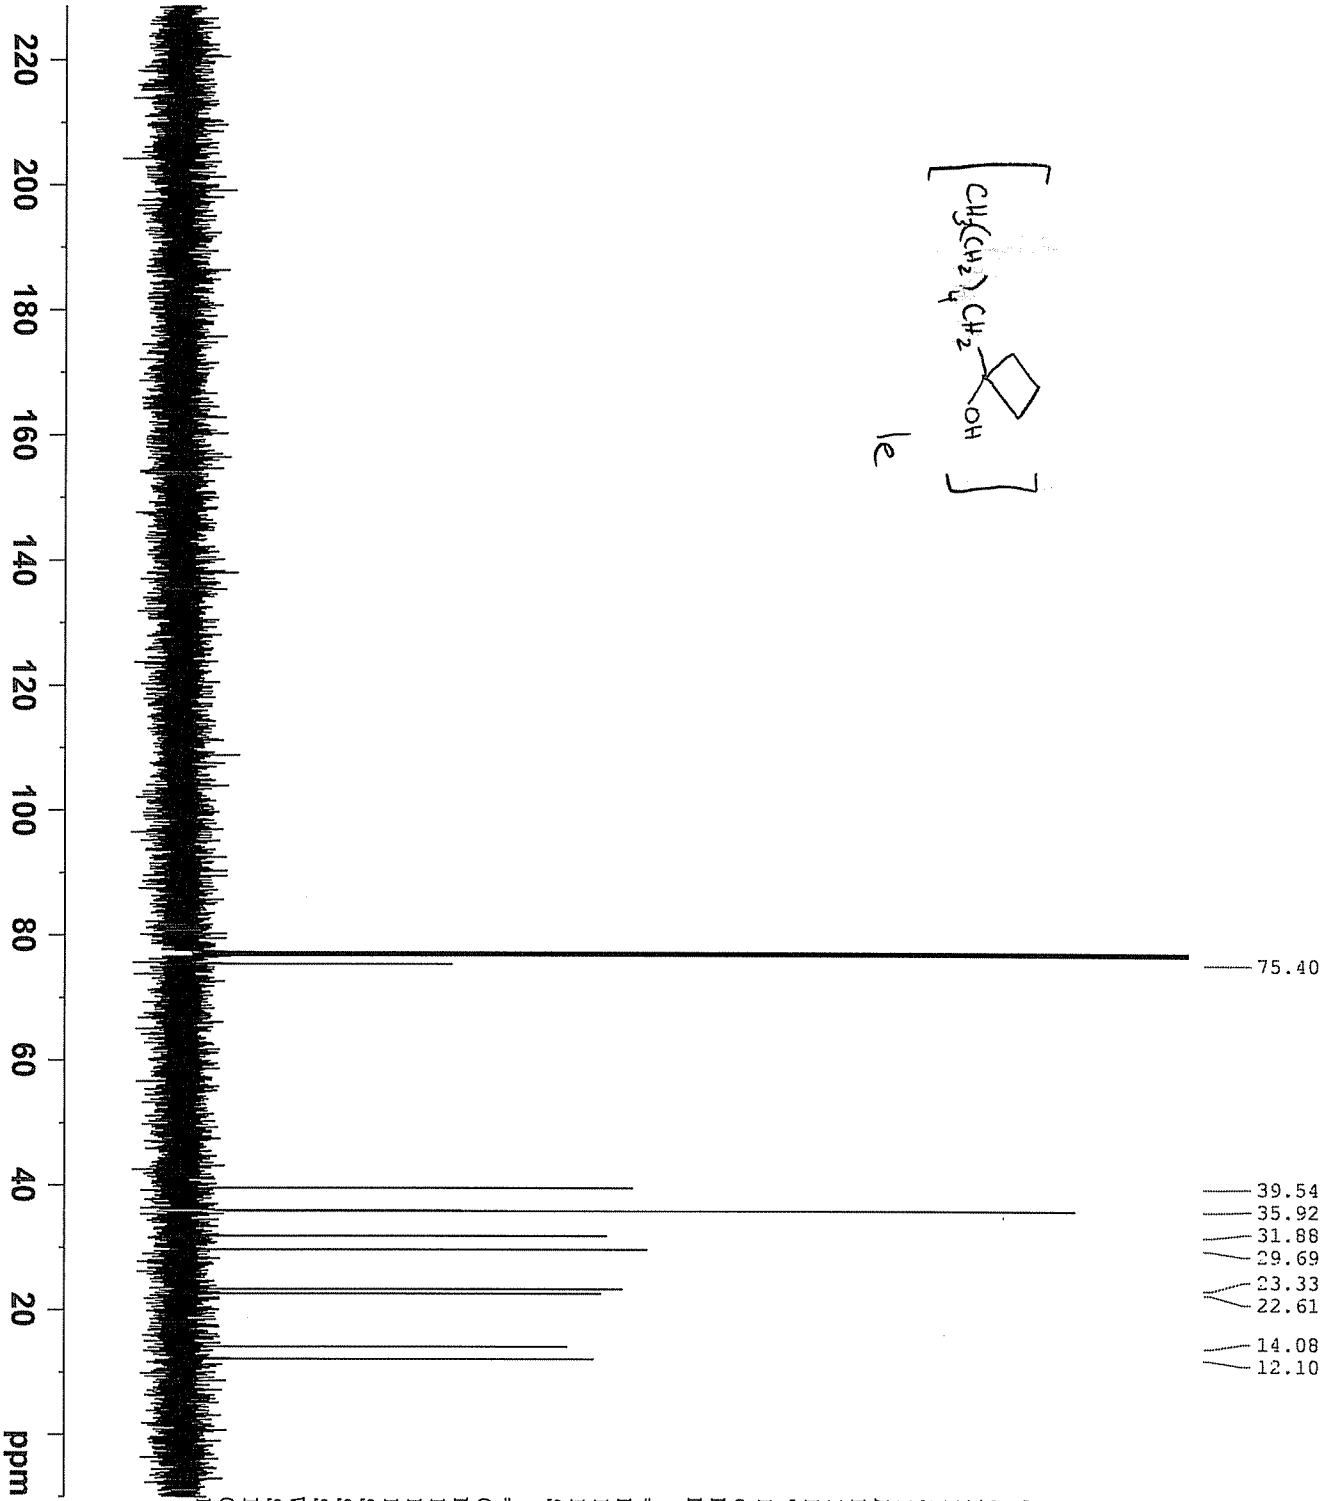

```

NAME HexBut01-052608
EXPNO 2
PROCNO 1
Date_ 20080527
Time 8.08
INSTRUM spect
PROBHD 5 mm PHBBO BB-
PULPROG zgdc
TD 65536
SOLVENT CDCl3
NS 112
DS 0
SWH 30030.029 Hz
FIDRES 0.458222 Hz
AQ 1.0912410 sec
RG 9195.2
DW 16.650 usec
DE 7.00 usec
TE 296.5 K
D1 2.00000000 sec
d11 0.03000000 sec
MCREST 0.00000000 sec
MCWRK 0.01500000 sec
  
```

```

===== CHANNEL F1 =====
NUC1 13C
P1 5.00 usec
PL1 -1.00 dB
SFO1 125.7715390 MHz
  
```

```

===== CHANNEL F2 =====
CPDPRG2 waltz16
NUC2 1H
PCPD2 110.00 usec
PL2 17.50 dB
PL12 17.00 dB
SFO2 500.1325000 MHz
SI 65536
SF 125.7577931 MHz
WDW EM
SSB 0
LB 1.00 Hz
GB 0
PC 1.40
  
```

High Vac

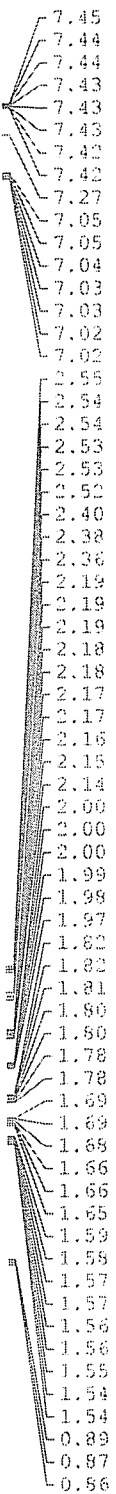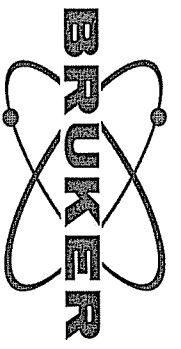

Current Data Parameters  
 NAME p-F-Pn-CyButol-2EtHy1-120508  
 EXPMO 8  
 PROCNO 1

F2 - Acquisition Parameters  
 Date\_ 20081206  
 Time\_ 11.21  
 INSTRUM spect  
 PROBHD 5 mm BBO BB-1H  
 PULPROG zg30  
 TD 32768  
 SOLVENT CDCl3  
 NS 6  
 DS 0  
 SWH 6009.615 Hz  
 FIDKRS 0.183399 Hz  
 AQ 2.7264509 sec  
 RG 256  
 DW 83.200 usec  
 DE 6.00 usec  
 TE 297.5 K  
 D1 1.00000000 sec  
 TD0 1

==== CHANNEL f1 =====  
 NUC1 1H  
 P1 14.00 usec  
 PL1 1.00 dB  
 SFO1 500.1327510 MHz

F2 - Processing parameters  
 SI 32768  
 SF 500.1300102 MHz  
 WDW EM  
 SSB 0  
 LB 0.30 Hz  
 GB 0  
 PC 1.00

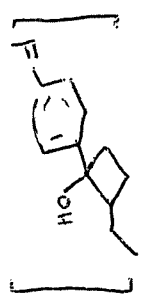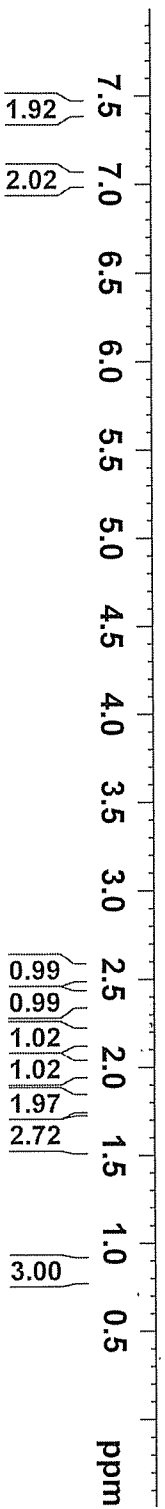

13C-NMR-Clean

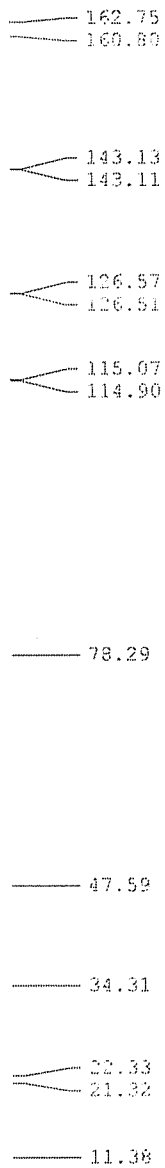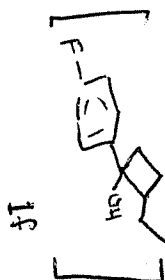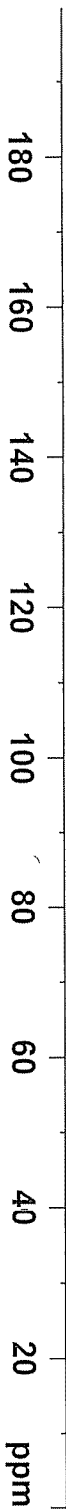

Current Data Parameters  
 NAME p-F-ph-Cybutol-2Ethy-1-120508  
 EXPNO 9  
 PROCNO 1

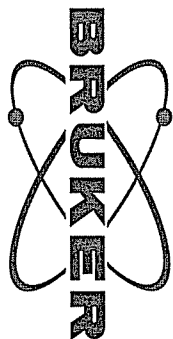

F2 - Acquisition Parameters  
 Date\_ 20081206  
 Time\_ 11.24  
 INSTRUM spect  
 PROBHD 5 mm BBO BB-1H  
 PULPROG zgpg30  
 TD 65536  
 SOLVENT CDCl3  
 NS 401  
 DS 4  
 SWH 30030.029 Hz  
 FIDRES 0.458222 Hz  
 AQ 1.0912410 sec  
 RG 3251  
 DM 16.650 usec  
 DE 7.00 usec  
 TE 297.9 K  
 D1 1.00000000 sec  
 d11 0.03000000 sec  
 TD0 1

==== CHANNEL f1 =====  
 NUC1 13C  
 P1 9.35 usec  
 PL1 1.00 dB  
 SFO1 125.7703640 MHz

==== CHANNEL f2 =====  
 CPDPRG2 waltz16  
 NUC2 1H  
 PCPDD2 100.00 usec  
 PL2 17.50 dB  
 PL12 17.50 dB  
 SFO2 500.1322150 MHz

F2 - Processing parameters  
 SI 32768  
 SF 125.757923 MHz  
 WDW EM  
 SSB 0  
 LB 1.00 Hz  
 GB 0  
 PC 1.40



ppm

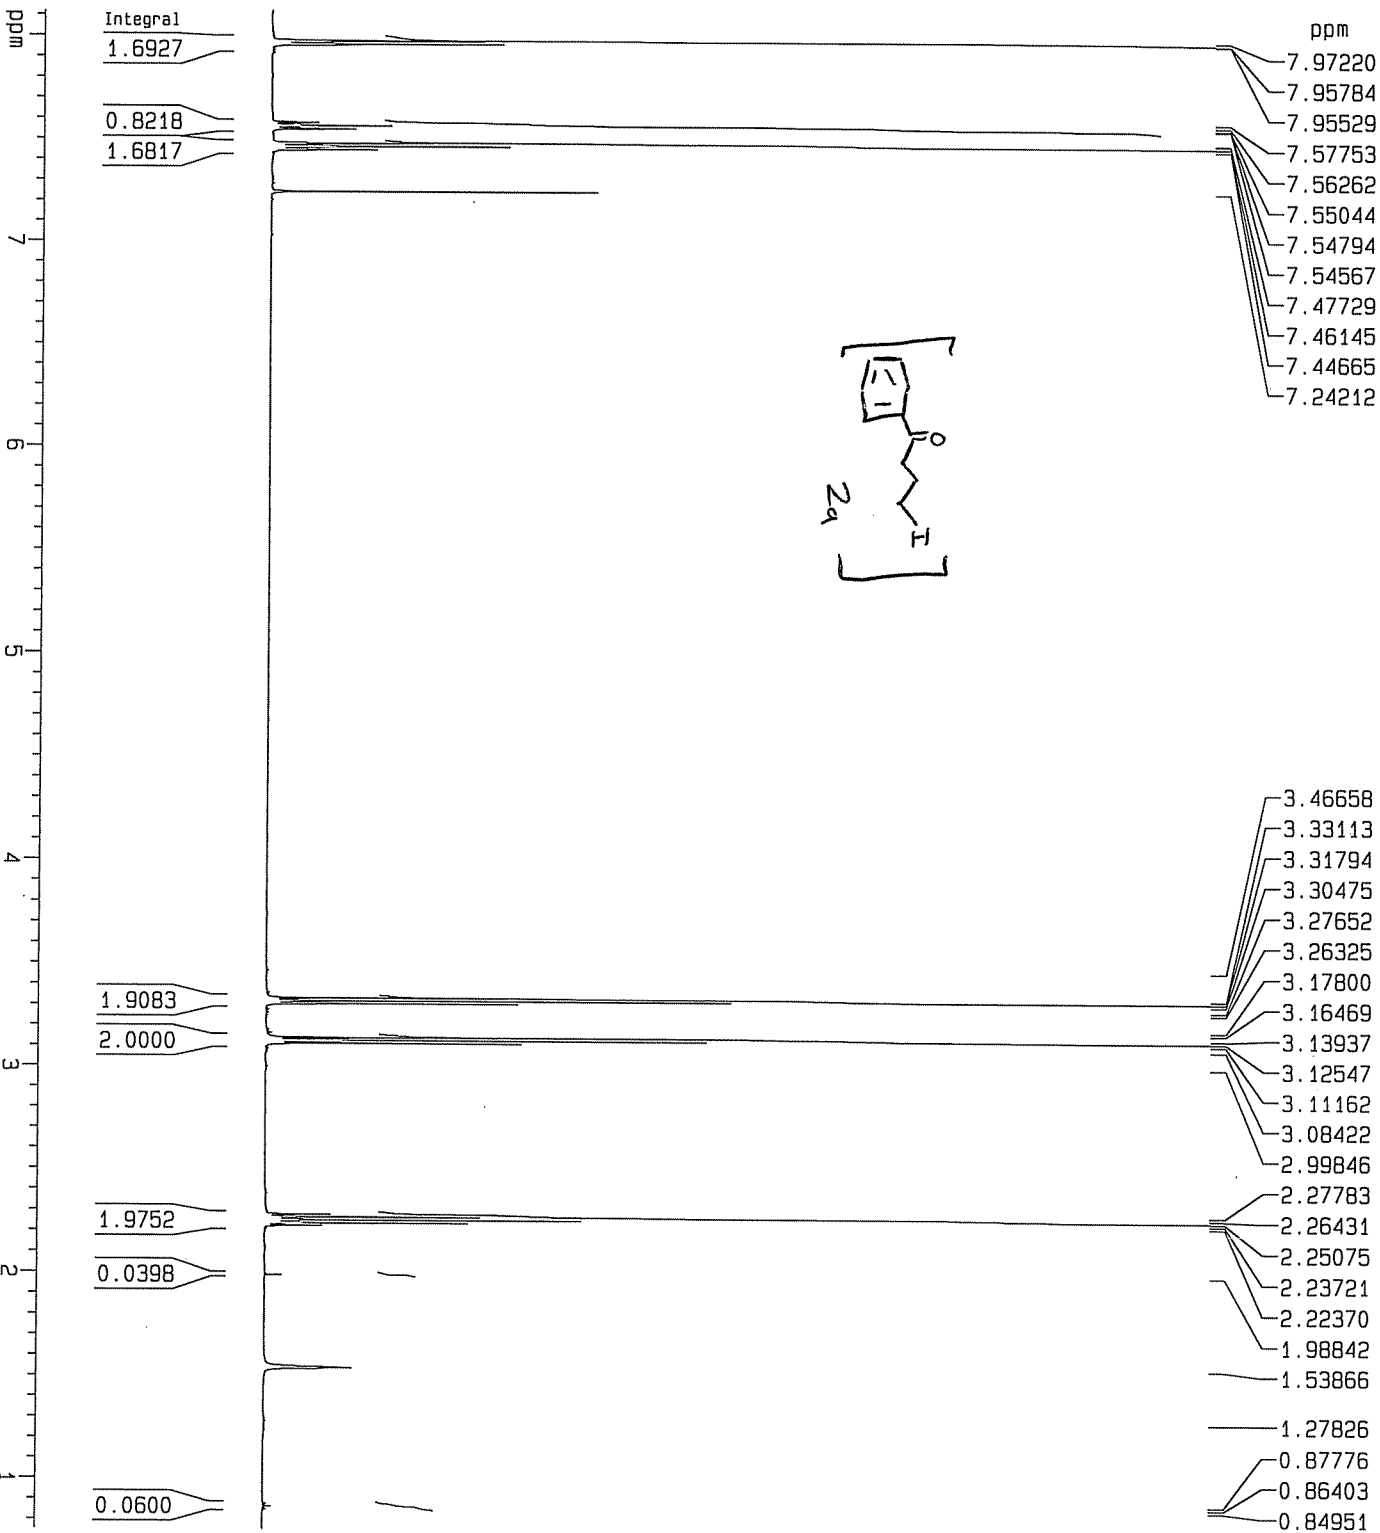

Current Data Parameters  
 NAME 4-I-ButPhenone-051408  
 EXPNO 3  
 PROCNO 1

F2 - Acquisition Parameters  
 Date\_ 20080515  
 Time 13.51

INSTRUM spect  
 PROBHD 5 mm PHEB0 BB-  
 PULPROG zg  
 TD 32768  
 SOLVENT CDCl3  
 NS 10  
 DS 0

SMH 7507.507 Hz  
 FIDRES 0.229111 Hz  
 AG 2.1824653 sec  
 RG 287.4

DW 66.600 usec  
 DE 7.00 usec  
 TE 298.2 K  
 D1 1.00000000 sec  
 d11 0.03000000 sec  
 MCREST 0.00000000 sec  
 MCWRRK 0.01500000 sec

==== CHANNEL f1 =====  
 NUC1 1H  
 P1 6.00 usec  
 PL1 -4.00 dB  
 SFO1 500.1323989 MHz

==== CHANNEL f2 =====  
 CPDPRG2 waltz16  
 NUC2 off  
 PCPD2 100.00 usec  
 PL2 120.00 dB  
 PL12 120.00 dB  
 SFO2 500.1300000 MHz

F2 - Processing parameters  
 S1 32768  
 SF 500.1300225 MHz  
 WDM EM  
 SSB 0  
 LB 0.20 Hz  
 GB 0  
 PC 4.00

1D NMR plot parameters  
 CX 20.00 cm  
 CY 0.00 cm  
 F1P 8.119 ppm  
 F1 4060.34 Hz  
 F2P 0.753 ppm  
 F2 376.75 Hz  
 PPMCM 0.36826 ppm/cm  
 HZCM 184.17952 Hz/cm

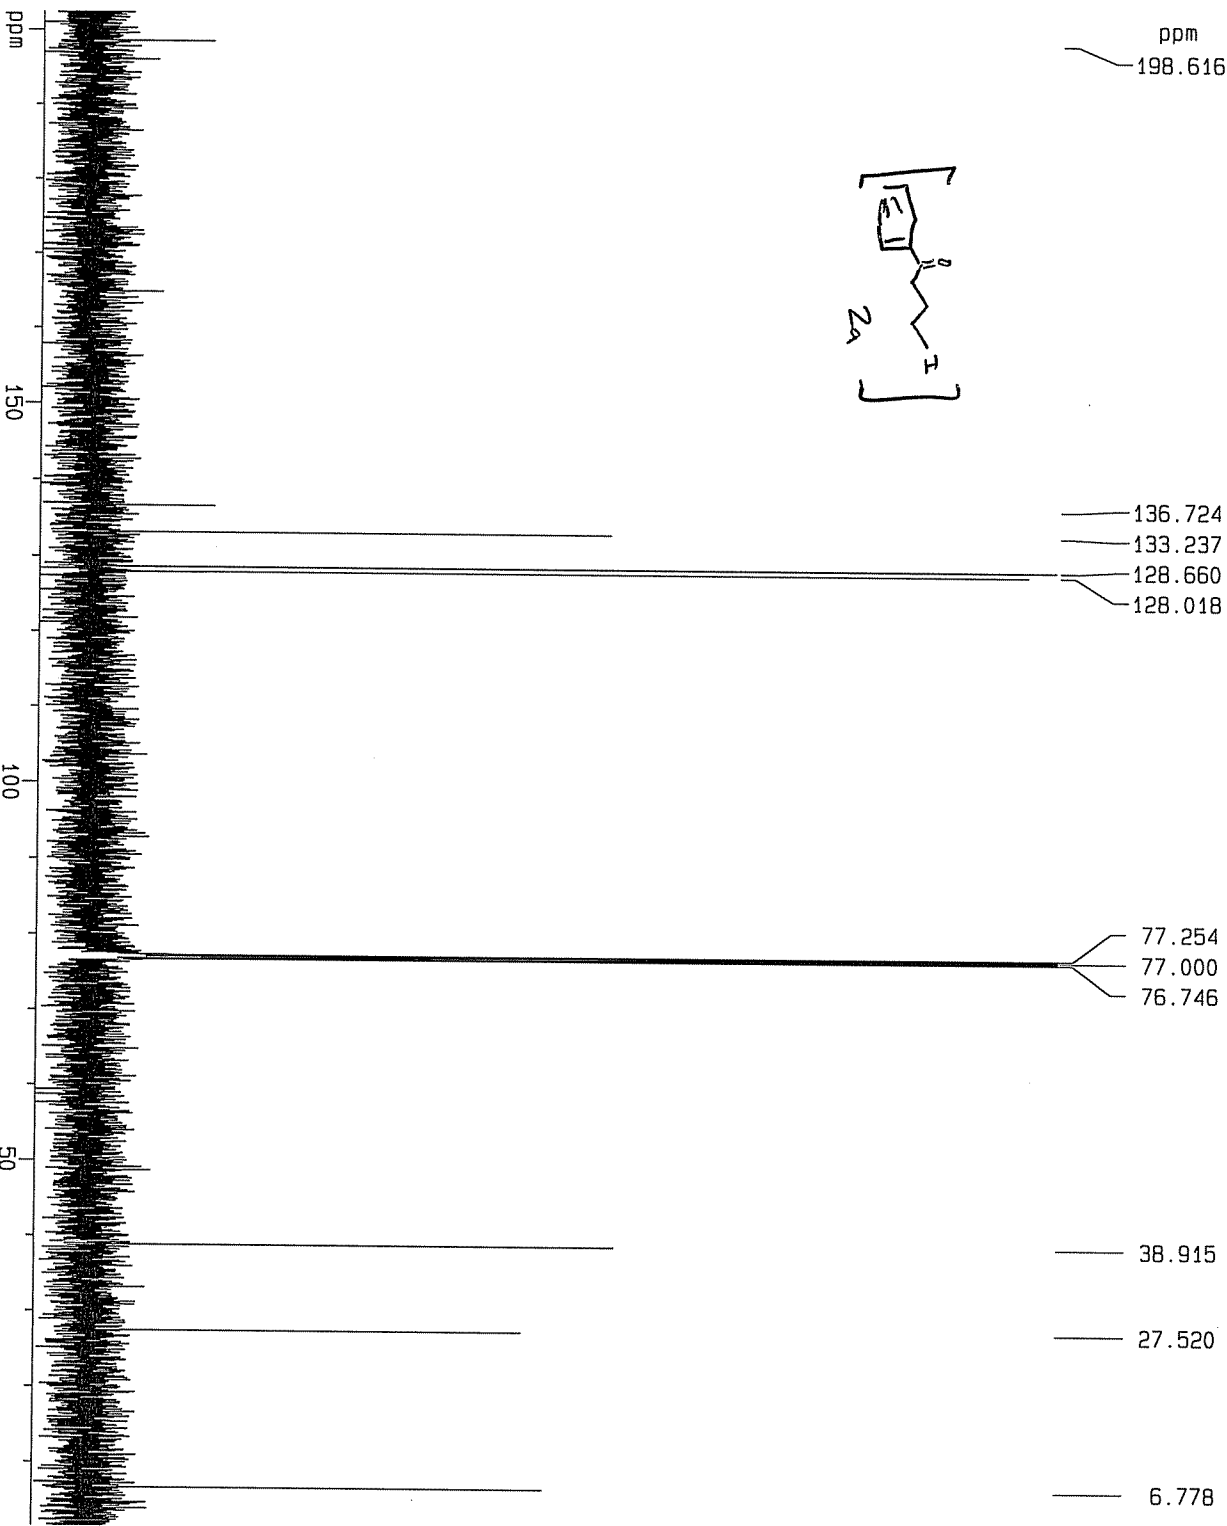

Current Data Parameters  
 NAME 4-1-ButPhenone-051408  
 EXPNO 4  
 PROCNO 1

F2 - Acquisition Parameters  
 Date\_ 20080515  
 Time 13.56  
 INSTRUM spect  
 PROBHD 5 mm PABBO BB-  
 PULPROG zgpg  
 TD 65536  
 SOLVENT CDCl3  
 NS 252  
 DS 0  
 SMH 30030.029 Hz  
 FIDRES 0.458222 Hz  
 AQ 1.0912410 sec  
 RG 1250.2  
 DW 16.650 usec  
 DE 7.00 usec  
 TE 298.2 K  
 D1 2.00000000 sec  
 d11 0.03000000 sec  
 MCREST 0.00000000 sec  
 MCMRK 0.01500000 sec

===== CHANNEL f1 =====  
 NUC1 13C  
 P1 5.00 usec  
 PL1 -1.00 dB  
 SF01 125.7715390 MHz

===== CHANNEL f2 =====  
 CPDPRG2 wa1tz16  
 NUC2 1H  
 PCPD2 110.00 usec  
 PL2 17.50 dB  
 PL12 17.00 dB  
 SF02 500.1325000 MHz

F2 - Processing parameters  
 SI 65536  
 SF 125.7577921 MHz  
 WDW EM  
 SSB 0  
 LB 1.00 Hz  
 GB 0  
 PC 1.40

1D NMR plot parameters  
 CX 20.00 cm  
 CY 12.50 cm  
 F1P 202.486 ppm  
 F1 25464.18 Hz  
 F2P 1.632 ppm  
 F2 205.28 Hz  
 PPMCM 10.04268 ppm/cm  
 HZCM 1262.94531 Hz/cm

Current Data Parameters  
 NAME 4-I-pMeOPhBut-062308  
 EXPNO 4  
 PROCNO 1

F2 - Acquisition Parameters  
 Date\_ 20080624  
 Time 17.05

INSTAUM Spect  
 PROBHD 5 mm PHBBO BB-  
 PULPROG zg30  
 TD 32768  
 SOLVENT CDCl3  
 NS 8  
 DS 0

SMH 7507.507 Hz  
 FIDRES 0.229114 Hz  
 AQ 2.1824653 sec  
 RG 362  
 DW 66.600 usec  
 DE 7.00 usec  
 TE 296.8 K

D1 1.00000000 sec  
 MCREST 0.00000000 sec  
 MCWRRK 0.01500000 sec

==== CHANNEL f1 =====  
 NUC1 1H  
 P1 7.90 usec  
 PL1 -4.00 dB  
 SFO1 500.1323989 MHz

F2 - Processing parameters  
 SI 32768  
 SF 500.1300225 MHz  
 MDM EM  
 SSB 0  
 LB 0.20 Hz  
 GB 0  
 PC 4.00

1D NMR plot parameters  
 CX 20.00 cm  
 CY 0.00 cm  
 F1P 8.067 ppm  
 F1 4034.43 Hz  
 F2P 2.055 ppm  
 F2 1027.89 Hz  
 PPMCM 0.30058 ppm/c  
 HZCM 150.32701 Hz/cm

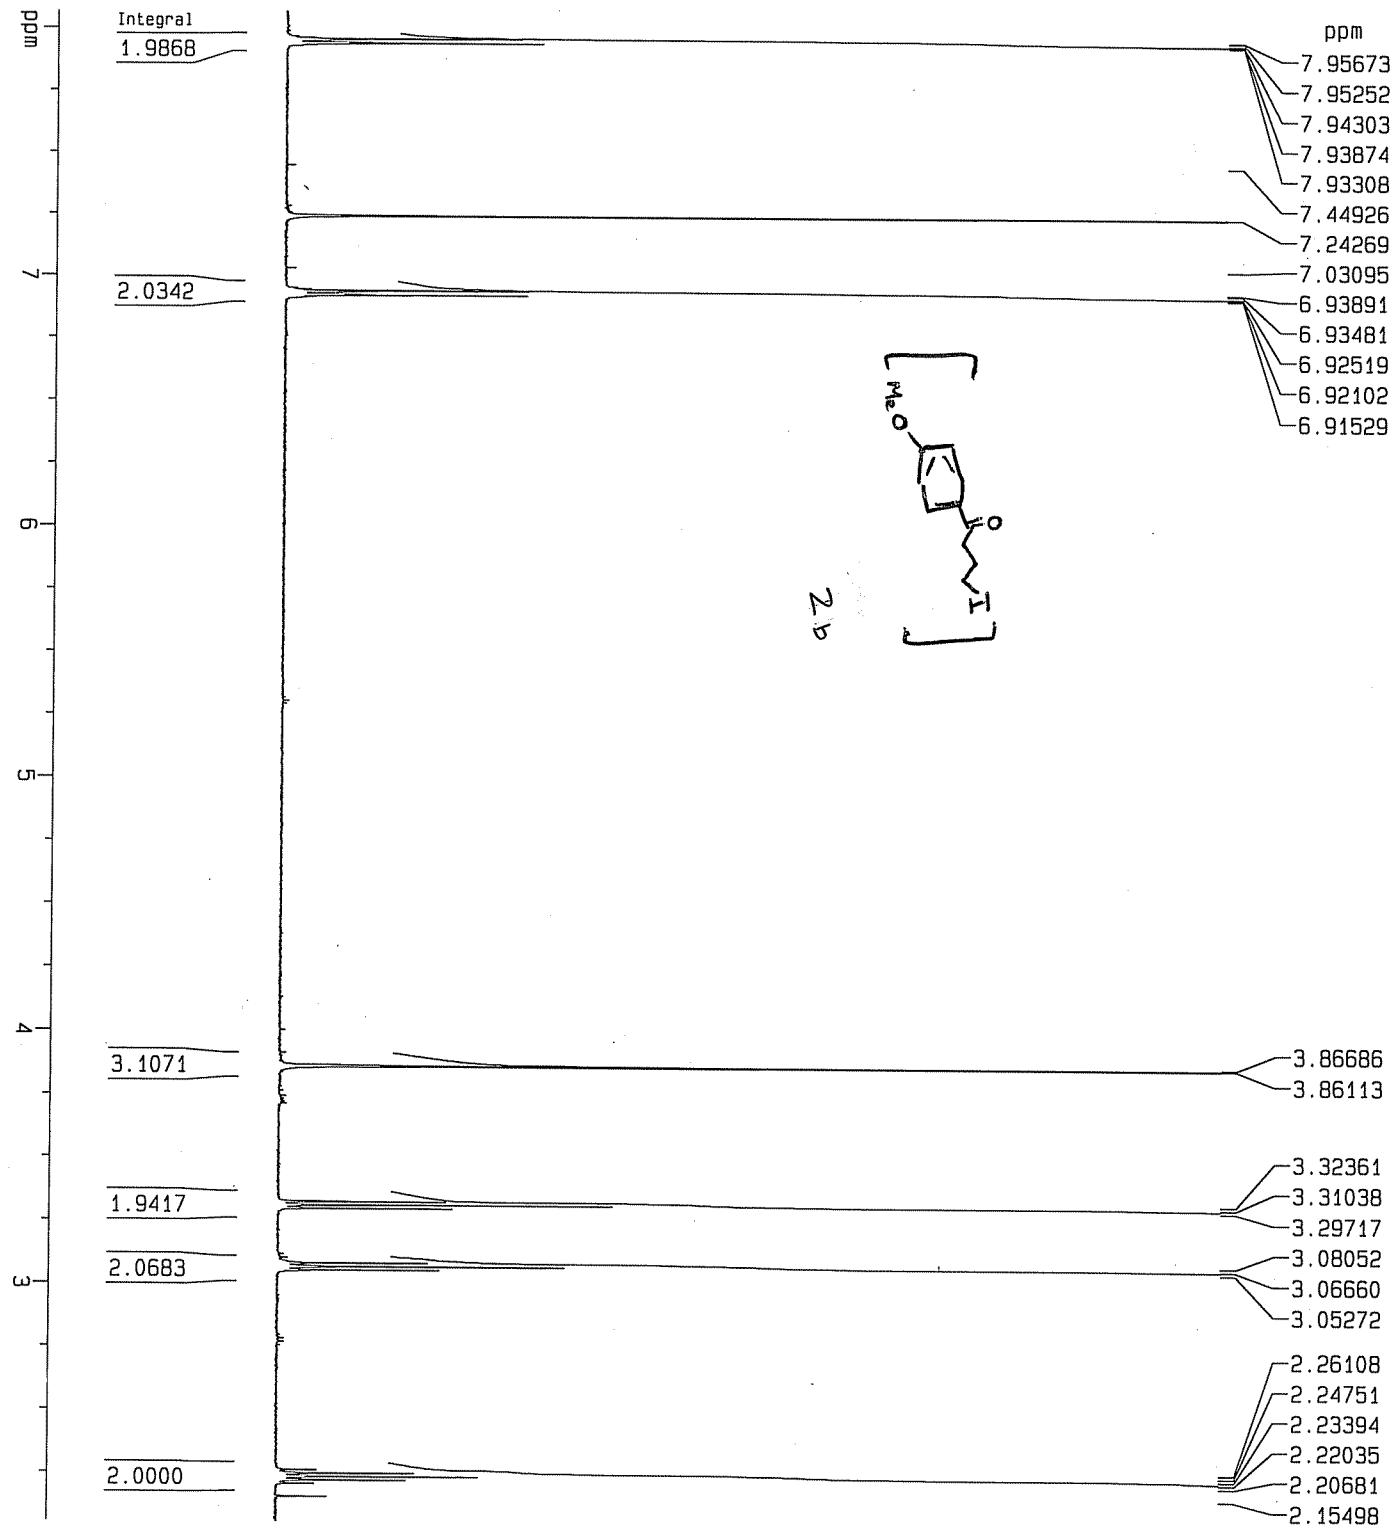

ppm  
197.161

163.552

130.282  
129.812

113.755

77.252  
76.998  
76.744

55.473

38.515

27.718

7.021

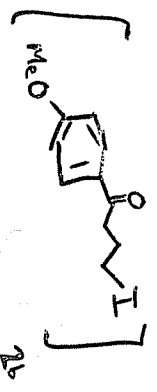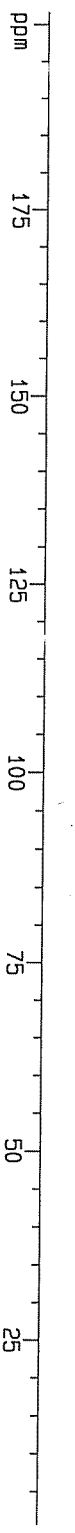

Current Data Parameters  
 NAME 4-I-pMeOPhBut-062308  
 EXPNO 5  
 PROCNO 1

F2 - Acquisition Parameters

Date\_ 20080624  
 Time 17.17  
 INSTRUM spect  
 PROBRD 5 mm PHEB0 B9-  
 PULPROG zgpg30  
 TD 65536  
 SOLVENT CDCl3  
 NS 53  
 DS 0  
 SMH 30030.029 HZ  
 FIDRES 0.458222 HZ  
 AQ 1.0912410 sec  
 RG 2580.3  
 DW 16.650 usec  
 DE 7.00 usec  
 TE 297.0 K  
 D1 1.00000000 sec  
 d11 0.03000000 sec  
 MCREST 0.00000000 sec  
 MCNMRK 0.01500000 sec

==== CHANNEL f1 =====  
 NUC1 13C  
 P1 9.30 usec  
 PL1 1.00 DB  
 SFO1 125.7715390 MHz

==== CHANNEL f2 =====  
 CPDPRG2 waltz16  
 NUC2 1H  
 PCPD2 100.00 usec  
 PL2 17.50 DB  
 PL12 17.50 DB  
 SFO2 500.1325000 MHz

F2 - Processing parameters  
 SI 65536  
 SF 125.7577949 MHz  
 WDW EM  
 SSB 0  
 LB 1.00 Hz  
 GB 0  
 PC 1.40

1D NMR plot parameters  
 CX 20.00 cm  
 CY 5.00 cm  
 F1P 201.695 ppm  
 F1 25363.50 Hz  
 F2P 0.582 ppm  
 F2 73.19 Hz  
 PPMCM 10.0517 ppm/cm  
 HZCM 1264.51536 Hz/cm

Frac3-4

8.00  
8.01  
8.00  
7.99

7.16  
7.14  
7.12

3.34  
3.32  
3.31  
3.12  
3.11  
3.10

2.28  
2.26  
2.25  
2.24  
2.23

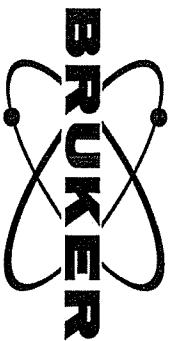

Current Data Parameters  
 NAME 4-I-pf-PnBut-090808  
 EXPNO 2  
 PROCNO 1

F2 - Acquisition Parameters  
 Date\_ 20080908  
 Time 13.56  
 INSTRUM spect  
 PROBHD 5 mm BBO BB-1H  
 PULPROG zg30  
 TD 32768  
 SOLVENT CDCl3  
 NS 6  
 DS 0  
 SWH 6009.615 Hz  
 FIDRES 0.183399 Hz  
 AQ 2.7264309 sec  
 RG 90.5  
 DW 83.200 usec  
 DE 6.00 usec  
 TE 296.4 K  
 D1 1.00000000 sec  
 TDO 1

==== CHANNEL F1 =====  
 NUCL1 1H  
 P1 7.35 usec  
 PL1 1.00 dB  
 SFO1 500.1327510 MHz  
 F2 - Processing parameters  
 SI 32768  
 SF 500.1300102 MHz  
 WDW EM  
 SSB 0  
 LB 0.30 Hz  
 GB 0  
 PC 1.00

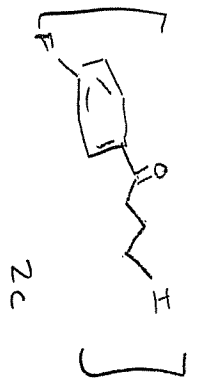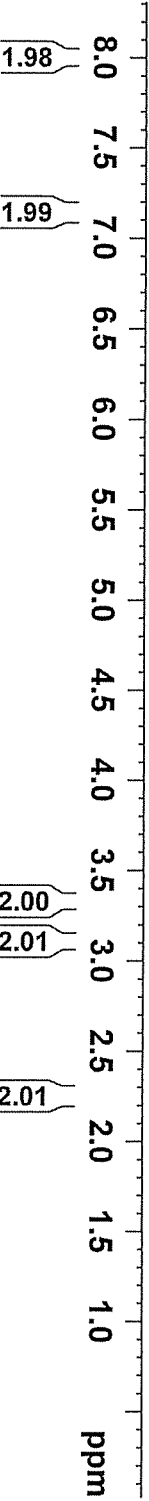

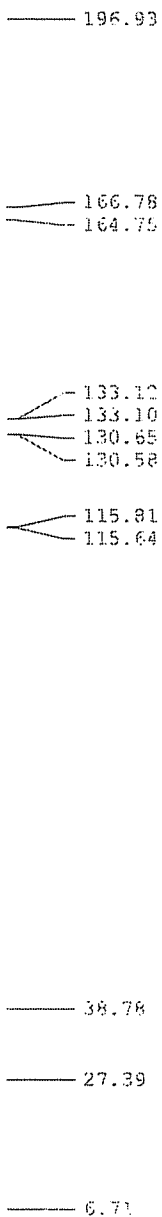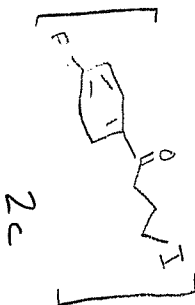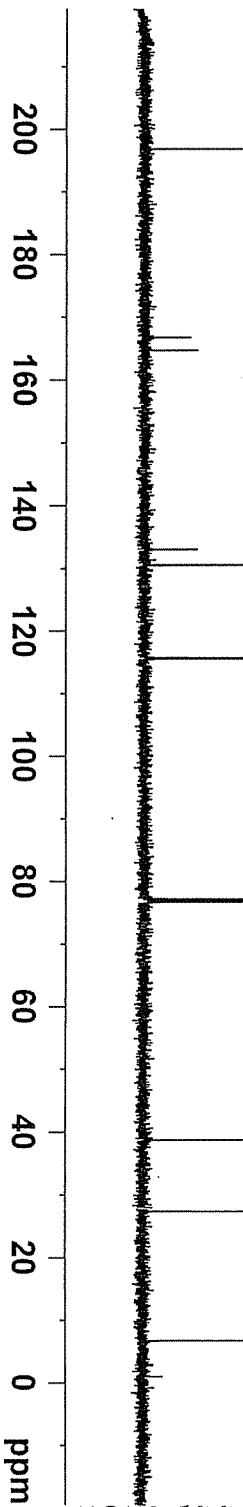

Current Data Parameters  
 NAME 4-I-pf-PhBut-090808  
 EXPNO 3  
 PROCNO 1

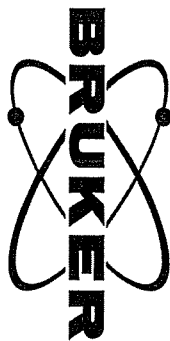

F2 - Acquisition Parameters  
 Date\_ 20080908  
 Time 13.59  
 INSTRUM spect  
 PROBHD 5 mm BBO BB-1H  
 PULPROG zgpg30  
 TD 65536  
 SOLVENT CDCl3  
 NS 85  
 DS 4  
 SWH 30030.029 Hz  
 FIDRES 0.458222 Hz  
 AQ 1.0912410 sec  
 RG 1448.2  
 DW 16.650 usec  
 DE 7.00 usec  
 TE 297.5 K  
 D1 1.00000000 sec  
 d11 0.03000000 sec  
 TD0 1

==== CHANNEL F1 =====  
 NUC1 13C  
 P1 5.00 usec  
 PL1 1.00 dB  
 SFO1 125.7703640 MHz

==== CHANNEL F2 =====  
 CPDPRG2 waltz16  
 NUC2 1H  
 PCPD2 90.00 usec  
 PL2 24.00 dB  
 PL12 24.00 dB  
 SFO2 500.1322150 MHz

F2 - Processing parameters  
 SI 32768  
 SF 125.7577969 MHz  
 WDW EM  
 SSB 0  
 LB 1.00 Hz  
 GB 0  
 PC 1.40

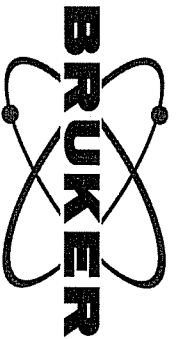

4-I-CyHexPro-052308

- 3.22
- 3.20
- 3.19
- 2.59
- 2.57
- 2.56
- 2.33
- 2.32
- 2.07
- 2.05
- 2.04
- 2.03
- 2.01
- 1.84
- 1.82
- 1.78
- 1.76
- 1.67
- 1.64
- 1.53
- 1.33
- 1.31

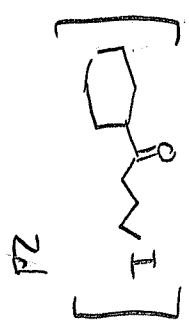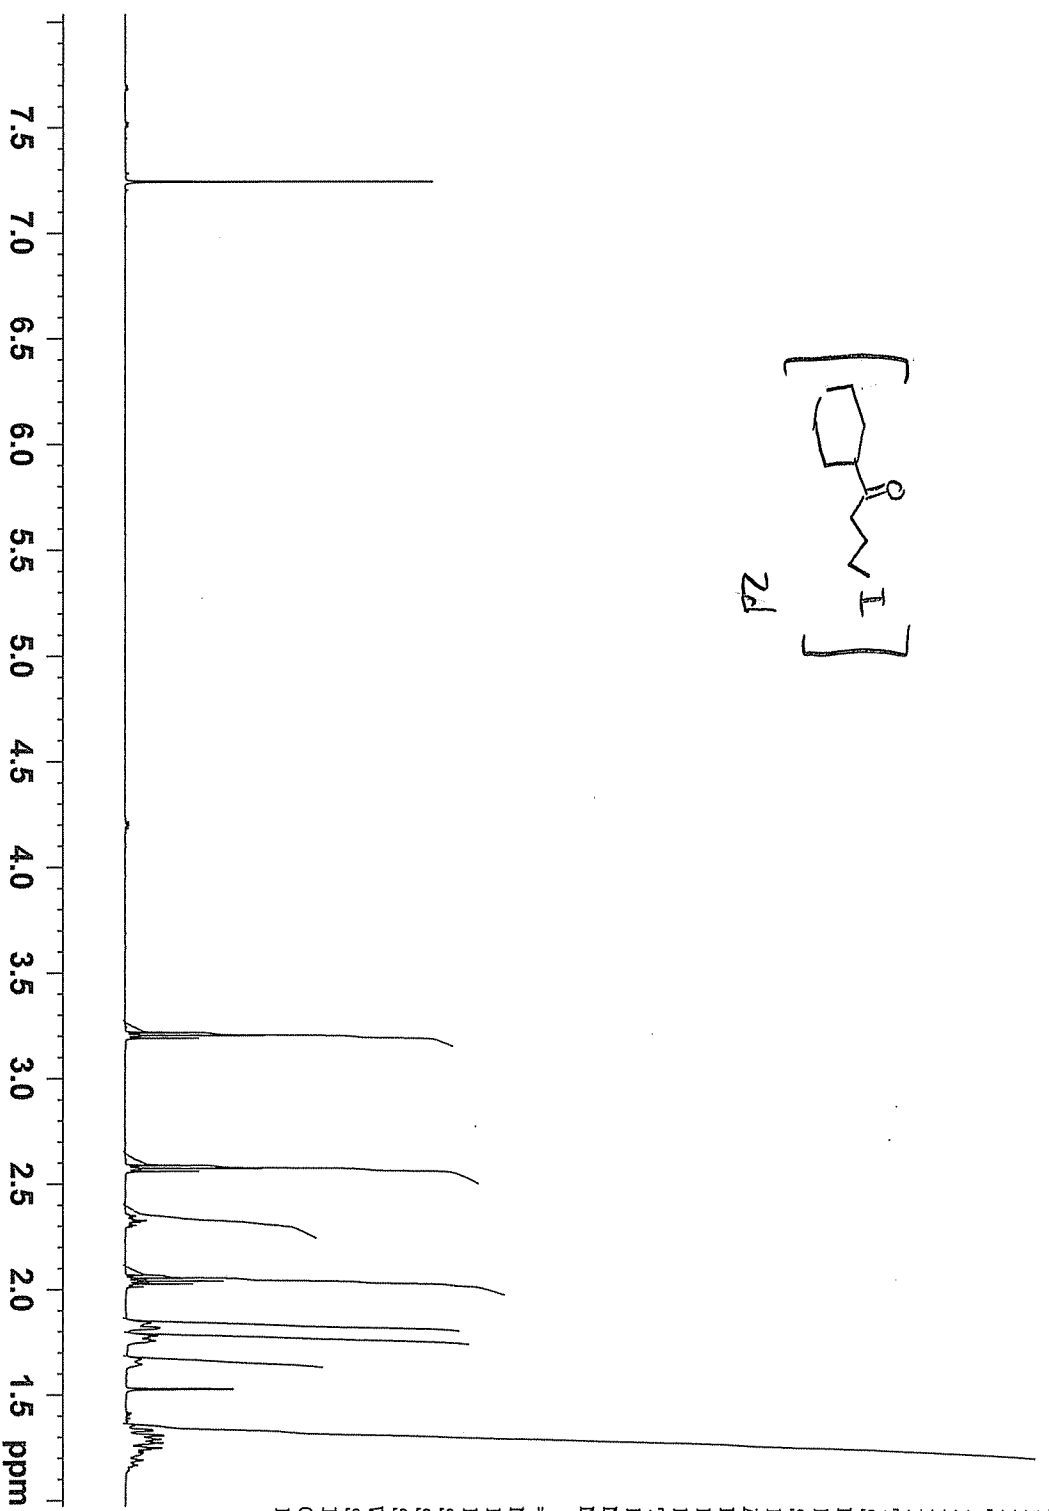

- 1.88
- 2.02
- 1.10
- 2.17
- 1.92
- 1.97
- 1.15
- 5.18

```

NAME 4-I-CyHexPro-052308
EXPNO 4
PROCNO 1
Date_ 20080523
Time 17.04
INSTRUM spect
PROBHD 5 mm PNBBO BB-
PULPROG zg
TD 32768
SOLVENT CDCl3
NS 10
DS 0
SWH 7507.507 Hz
FIDRES 0.2229111 Hz
AQ 2.1824653 sec
RG 256
DW 66.600 usec
DE 7.00 usec
TE 295.5 K
D1 1.00000000 sec
MCREST 0.00000000 sec
MCTWRK 0.01500000 sec

===== CHANNEL f1 =====
NUC1 1H
P1 6.00 usec
PL1 -4.00 dB
SFO1 500.1323989 MHz
SI 32768
SF 500.1300225 MHz
WDW EM
SSB 0
LB 0.20 Hz
GB 0
PC 4.00
  
```

212.63

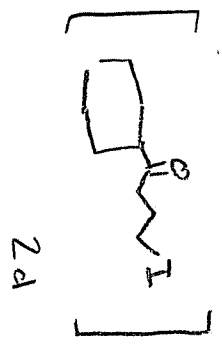

50.96  
 40.72  
 28.48  
 26.97  
 25.80  
 25.63  
 6.96

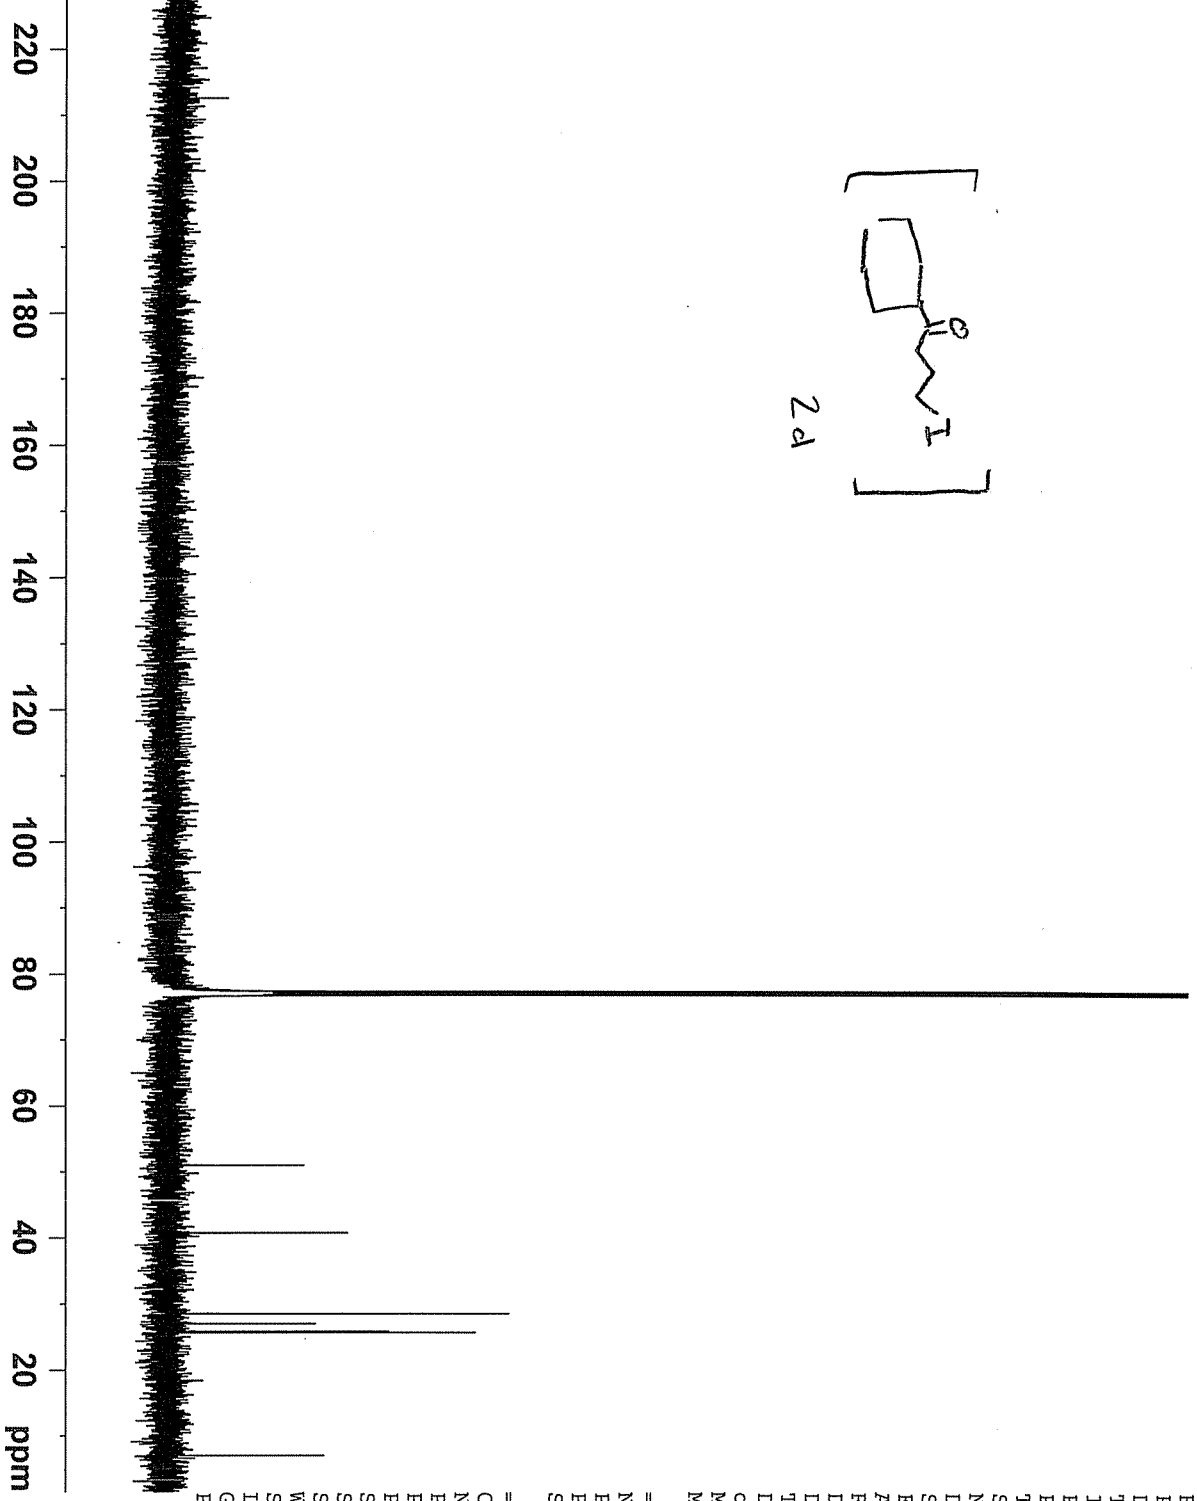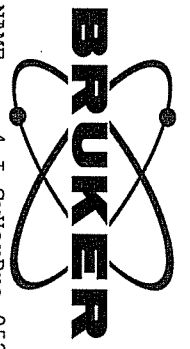

NAME 4-I-CyHexPro-052308

EXPNO 3  
 PROCNO 1  
 Date\_ 20080523  
 Time 13.11  
 INSTRUM spect  
 PROBHD 5 mm PNBBO BB-  
 PULPROG zgpg  
 TD 65536  
 SOLVENT CDCl3  
 NS 2789  
 DS 0  
 SWH 30030.029 Hz  
 FIDRES 0.458222 Hz  
 AQ 1.0912410 sec  
 RG 5160.6  
 DW 16.650 usec  
 DE 7.00 usec  
 TE 296.1 K  
 D1 2.00000000 sec  
 d11 0.03000000 sec  
 MCREST 0.00000000 sec  
 MCWRK 0.01500000 sec

==== CHANNEL F1 =====  
 NUC1 13C  
 P1 5.00 usec  
 PL1 -1.00 dB  
 SFO1 125.7715390 MHz

==== CHANNEL F2 =====  
 CPDPRG2 waltz16  
 NUC2 1H  
 PCPD2 110.00 usec  
 PL2 17.50 dB  
 PL12 17.00 dB  
 SFO2 500.1325000 MHz  
 SI 65536  
 SF 125.7577926 MHz  
 WDW EM  
 SSB 0  
 LB 1.00 Hz  
 GB 0  
 PC 1.40



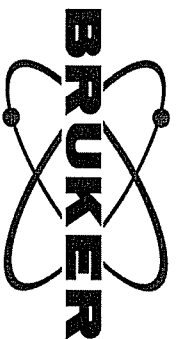

4-I-HexBut2-060408

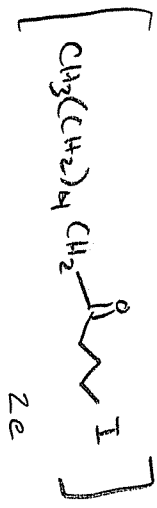

- 3.22
- 3.21
- 3.19
- 2.55
- 2.54
- 2.52
- 2.41
- 2.39
- 2.38
- 2.06
- 2.05
- 2.04
- 1.55
- 1.54
- 1.29
- 1.27
- 1.26
- 1.26
- 1.25
- 0.88
- 0.87
- 0.86
- 0.85

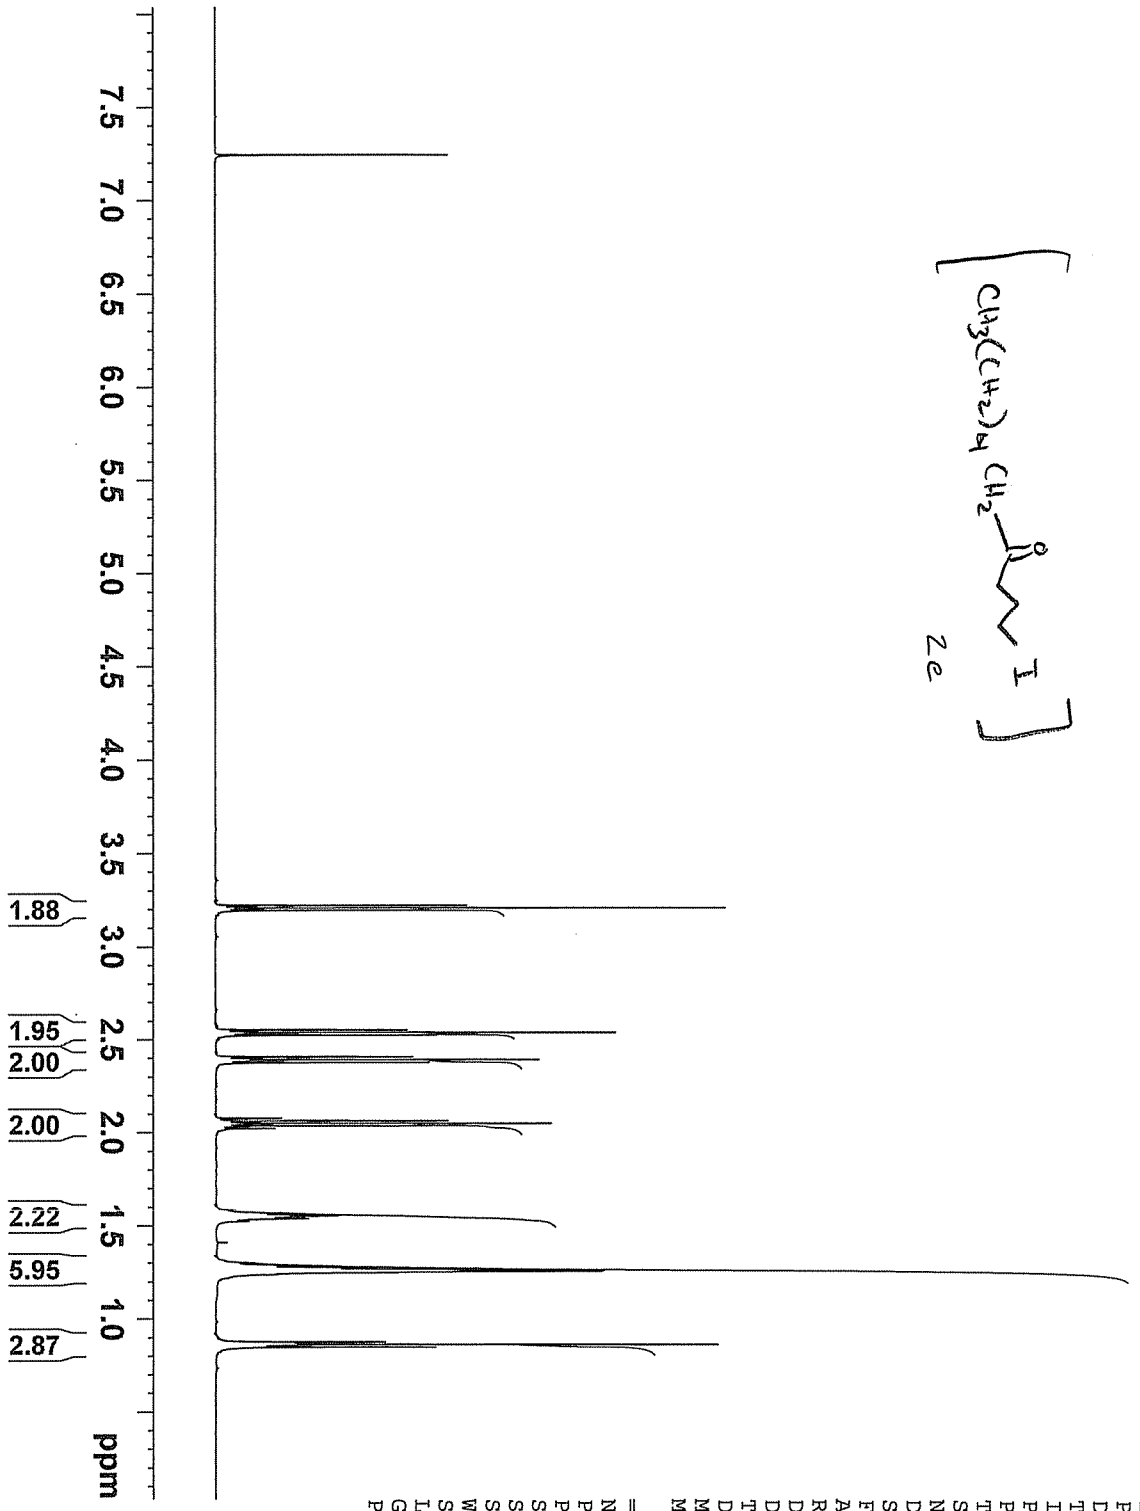

```

NAME 4-I-HexBut2-060408
EXPNO 1
PROCNO 1
Date_ 20080604
Time 16.31
INSTRUM spect
PROBHD 5 mm PHEBO BB-
PULPROG zg
TD 32768
SOLVENT CDCl3
NS 8
DS 0
SWH 7507.507 Hz
FIDRES 0.229111 Hz
AQ 2.1824653 sec
RG 161.3
DW 66.600 usec
DE 7.00 usec
TE 295.4 K
D1 1.00000000 sec
MCREST 0.00000000 sec
MCWRK 0.01500000 sec
  
```

```

===== CHANNEL f1 =====
NUC1 1H
P1 6.00 usec
PL1 -4.00 dB
SFO1 500.1323989 MHz
SI 32768
SF 500.1300225 MHz
WDW EM
SSB 0
LB 0.20 Hz
GB 0
PC 4.00
  
```

209.76

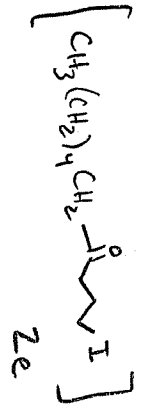

- 43.07
- 42.79
- 31.56
- 28.87
- 27.02
- 23.81
- 22.47
- 14.02
- 6.71

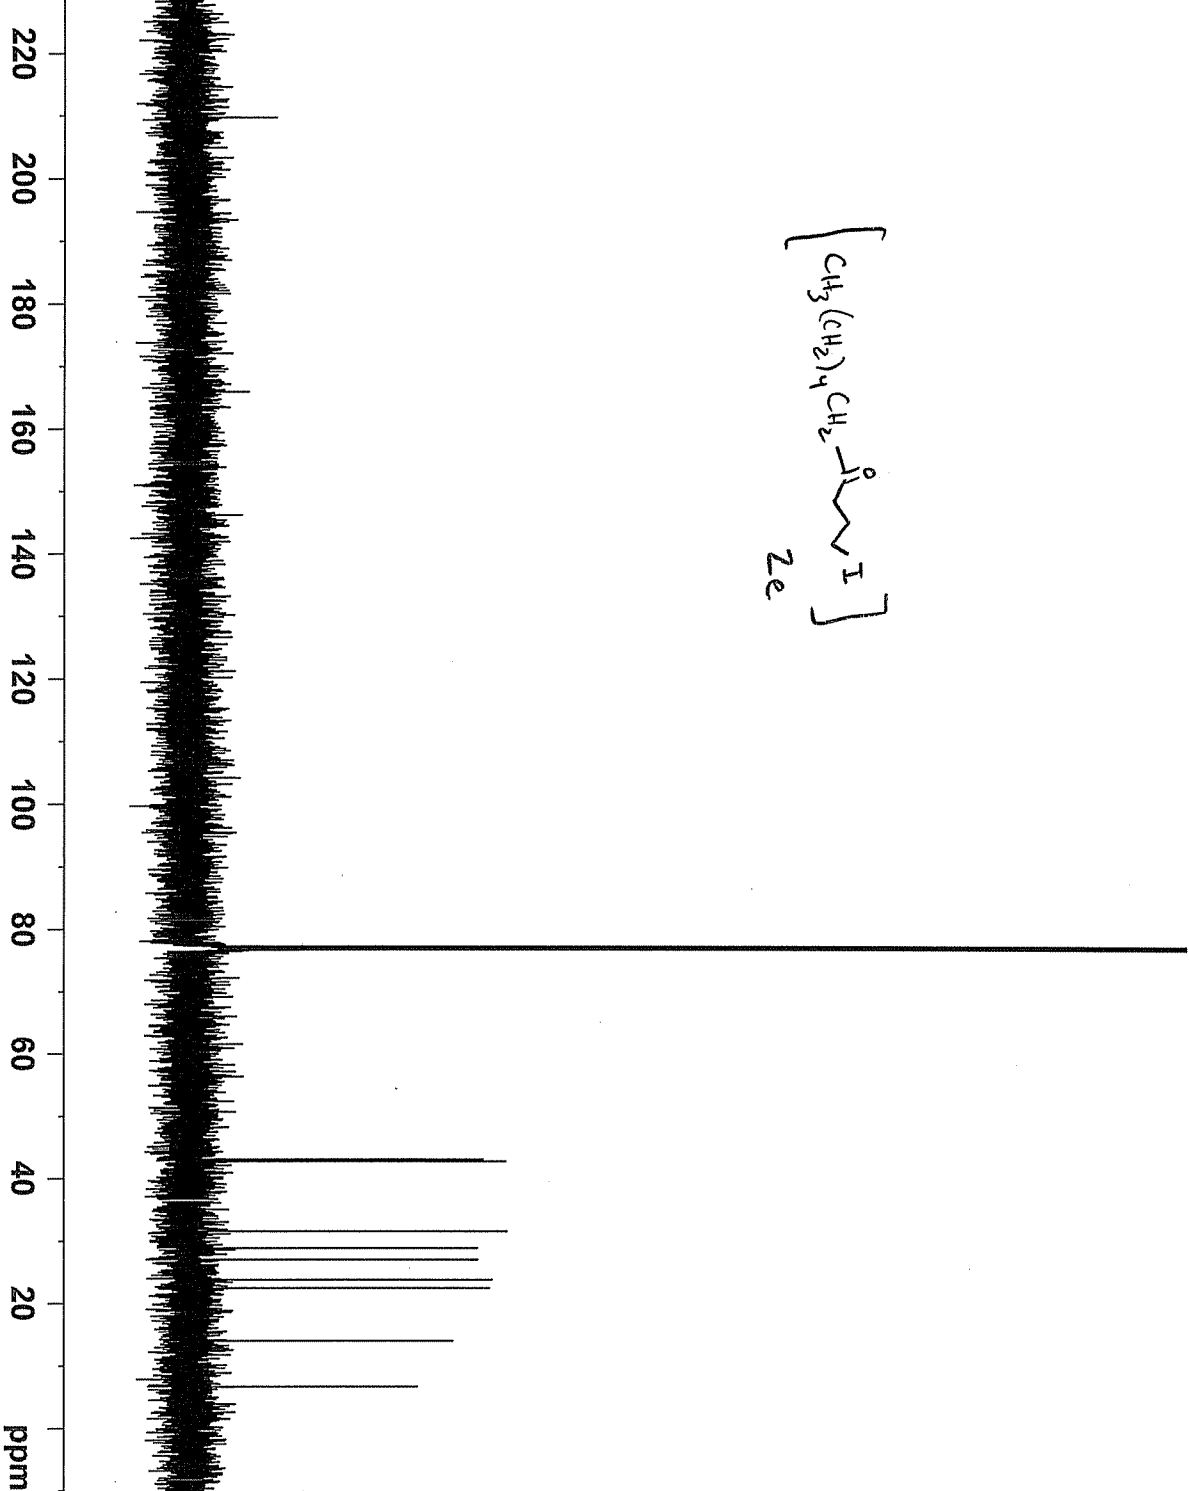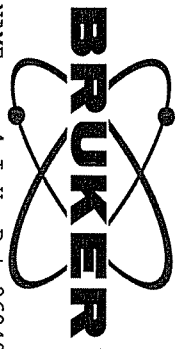

4-I-HexBut-060408

```

NAME
EXPNO          3
PROCNO         1
Date_          20080604
Time           16.25
INSTRUM        spect
PROBHD         5 mm PHBBO BB-
PULPROG        zgdc30
TD             65536
SOLVENT        CDCl3
NS             92
DS             0
SWH            30030.029 Hz
FIDRES        0.458222 Hz
AQ            1.0912410 sec
RG            1625.5
DW            16.650 usec
DE            7.00 usec
TE            295.6 K
D1            2.00000000 sec
d11           0.03000000 sec
MCREST        0.00000000 sec
MCWRK         0.01500000 sec
  
```

```

===== CHANNEL F1 =====
NUC1          13C
P1            9.30 usec
PL1           1.00 dB
SFO1         125.7715390 MHz
  
```

```

===== CHANNEL F2 =====
CPDPRG2      waltz16
NUC2          1H
PCPD2        110.00 usec
PL2          -4.00 dB
PL12         18.88 dB
SFO2         500.1325000 MHz
SI           65536
SF           125.7577935 MHz
WDW          EM
SSB          0
LB           1.00 Hz
GB           0
PC           1.40
  
```

13C-NMR-Crude

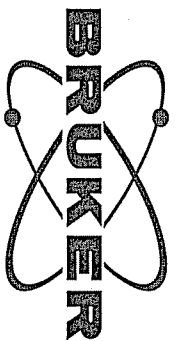

Current Data Parameters  
 NAME 4-I-p-F-Ph-But-2Etyl-120908  
 EXPNO 3  
 PROCNO 1

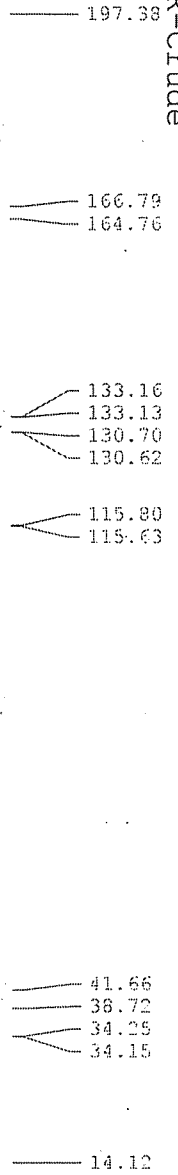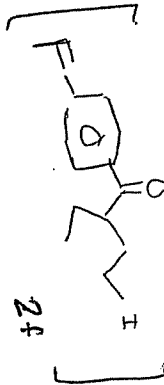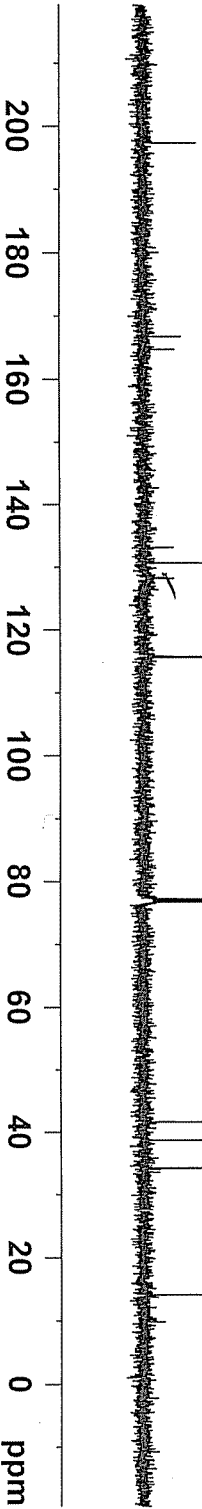

F2 - Acquisition Parameters  
 Date\_ 20081209  
 Time 18.17  
 INSTRUM spect  
 PROBHD 5 mm BBO BB-1H  
 PULPROG zgpg30  
 TD 65536  
 SOLVENT CDCl3  
 NS 121  
 DS 4  
 SWH 30030.029 Hz  
 FIDRES 0.458222 Hz  
 AQ 1.0512410 sec  
 RG 3251  
 DW 16.650 usec  
 DE 7.00 usec  
 TE 298.1 K  
 D1 1.00000000 sec  
 d11 0.03000000 sec  
 TD0 1

==== CHANNEL F1 =====  
 NUC1 13C  
 P1 9.35 usec  
 PL1 1.00 dB  
 SFO1 125.7703640 MHz

==== CHANNEL F2 =====  
 CPDPRG2 waltz16  
 NUC2 1H  
 PCPD2 100.00 usec  
 PL2 17.50 dB  
 PL12 17.50 dB  
 SFO2 500.1322150 MHz

F2 - Processing parameters  
 SI 32768  
 SF 125.7577976 MHz  
 WDW EM  
 SSB 0  
 LB 1.00 Hz  
 GB 0  
 PC 1.40

Minicol

8.04  
8.04  
8.03  
8.03  
8.02  
8.02  
8.01  
8.01  
7.27  
7.17  
7.17  
7.16  
7.16  
7.15  
7.15  
7.15  
7.14  
7.14  
7.13  
7.13  
4.19  
4.19  
4.18  
4.17  
4.16  
4.16  
3.49  
3.25  
3.24  
3.23  
3.22  
3.20  
3.19  
3.17  
3.16  
3.16  
3.14  
2.21  
2.20  
2.20  
2.19  
2.19  
2.18  
2.18  
2.17  
2.17  
1.96  
1.94  
1.93  
1.91  
1.88  
1.87  
1.86  
1.85  
1.85  
1.84  
1.83  
1.83  
1.44  
1.31  
1.26  
1.09  
1.08  
1.07  
1.06  
1.06  
0.98  
0.89  
0.88  
0.86

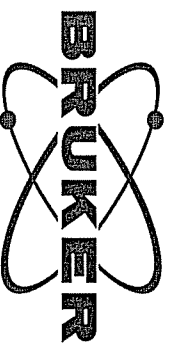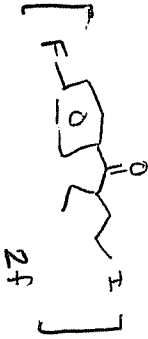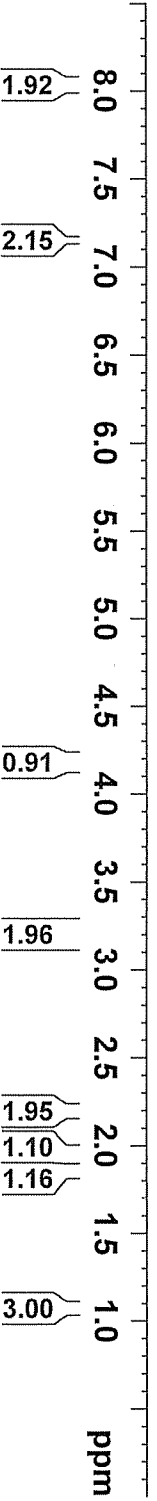

Current Data Parameters  
 NAME 4-I-p-F-PI-BUT-2Ethy1-120908  
 EXPNO 4  
 PROCNO 1

F2 - Acquisition Parameters  
 Date\_ 20081210  
 Time 10.01  
 INSTRUM spect  
 PROBHD 5 mm BBO BB-1H  
 PULPROG zg30  
 TD 32768  
 SOLVENT CDCl3  
 NS 6  
 DS 0  
 SWH 6009.615 Hz  
 FIDRES 0.183399 Hz  
 AQ 2.7264309 sec  
 RG 90.5  
 DW 83.200 usec  
 DE 6.00 usec  
 TE 297.4 K  
 D1 1.00000000 sec  
 TDO 1

==== CHANNEL F1 =====  
 NUC1 1H  
 P1 14.00 usec  
 PL 1.00 dB  
 SFO1 500.1327510 MHz  
 F2 - Processing parameters  
 SI 32768  
 SF 500.1300102 MHz  
 WDW EM  
 SSB 0  
 GB 0  
 PC 1.00

Current Data Parameters  
 NAME 4-Br-PhBut-053008  
 EXPNO 3  
 PROCNO 1

F2 - Acquisition Parameters  
 Date\_ 20080530  
 Time 11.47  
 INSTRUM spect  
 PROBHD 5 mm TXI 1H/2H  
 PULPROG zg30  
 TD 32768  
 SOLVENT CDC13  
 NS 8  
 DS 0  
 SWH 7507.507 Hz  
 FIDRES 0.229111 Hz  
 AQ 2.1824653 sec  
 RG 724.1  
 DW 66.600 use  
 DE 7.00 use  
 TE 294.7 K  
 D1 1.00000000 sec  
 MCREST 0.00000000 sec  
 MCWPK 0.01500000 sec

===== CHANNEL f1 =====  
 NUC1 1H  
 P1 8.30 use  
 PL1 1.00 dB  
 SFO1 500.1323989 MHz

F2 - Processing parameters  
 SI 32768  
 SF 500.1300225 MHz  
 WDW EM  
 SSB 0  
 LB 0.20 Hz  
 GB 0  
 PC 4.00

1D NMR plot parameters  
 CX 20.00 cm  
 CY 0.00 cm  
 F4P 8.041 ppm  
 F1 4021.73 Hz  
 F2P 1.412 ppm  
 F2 706.17 Hz  
 PPMCM 0.33147 ppm  
 HZCM 165.77797 Hz/

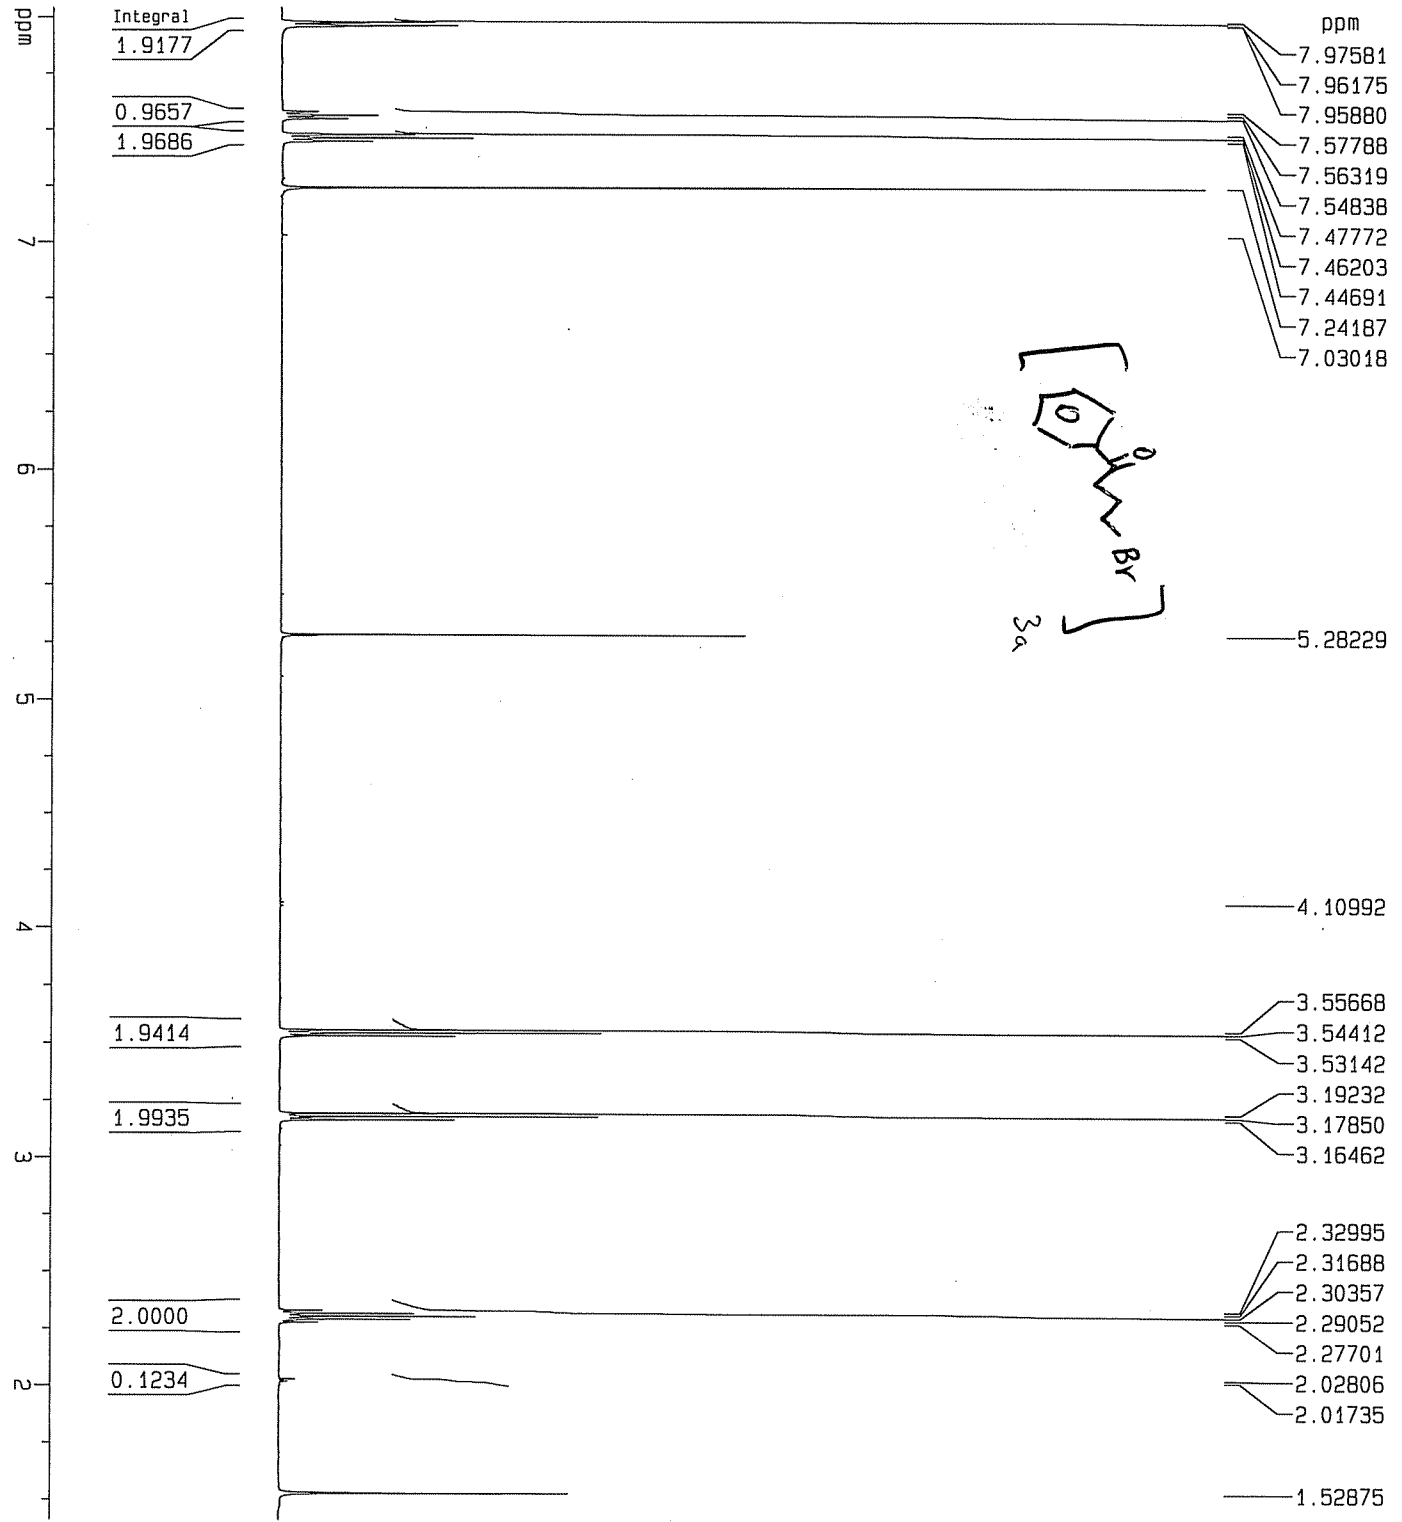

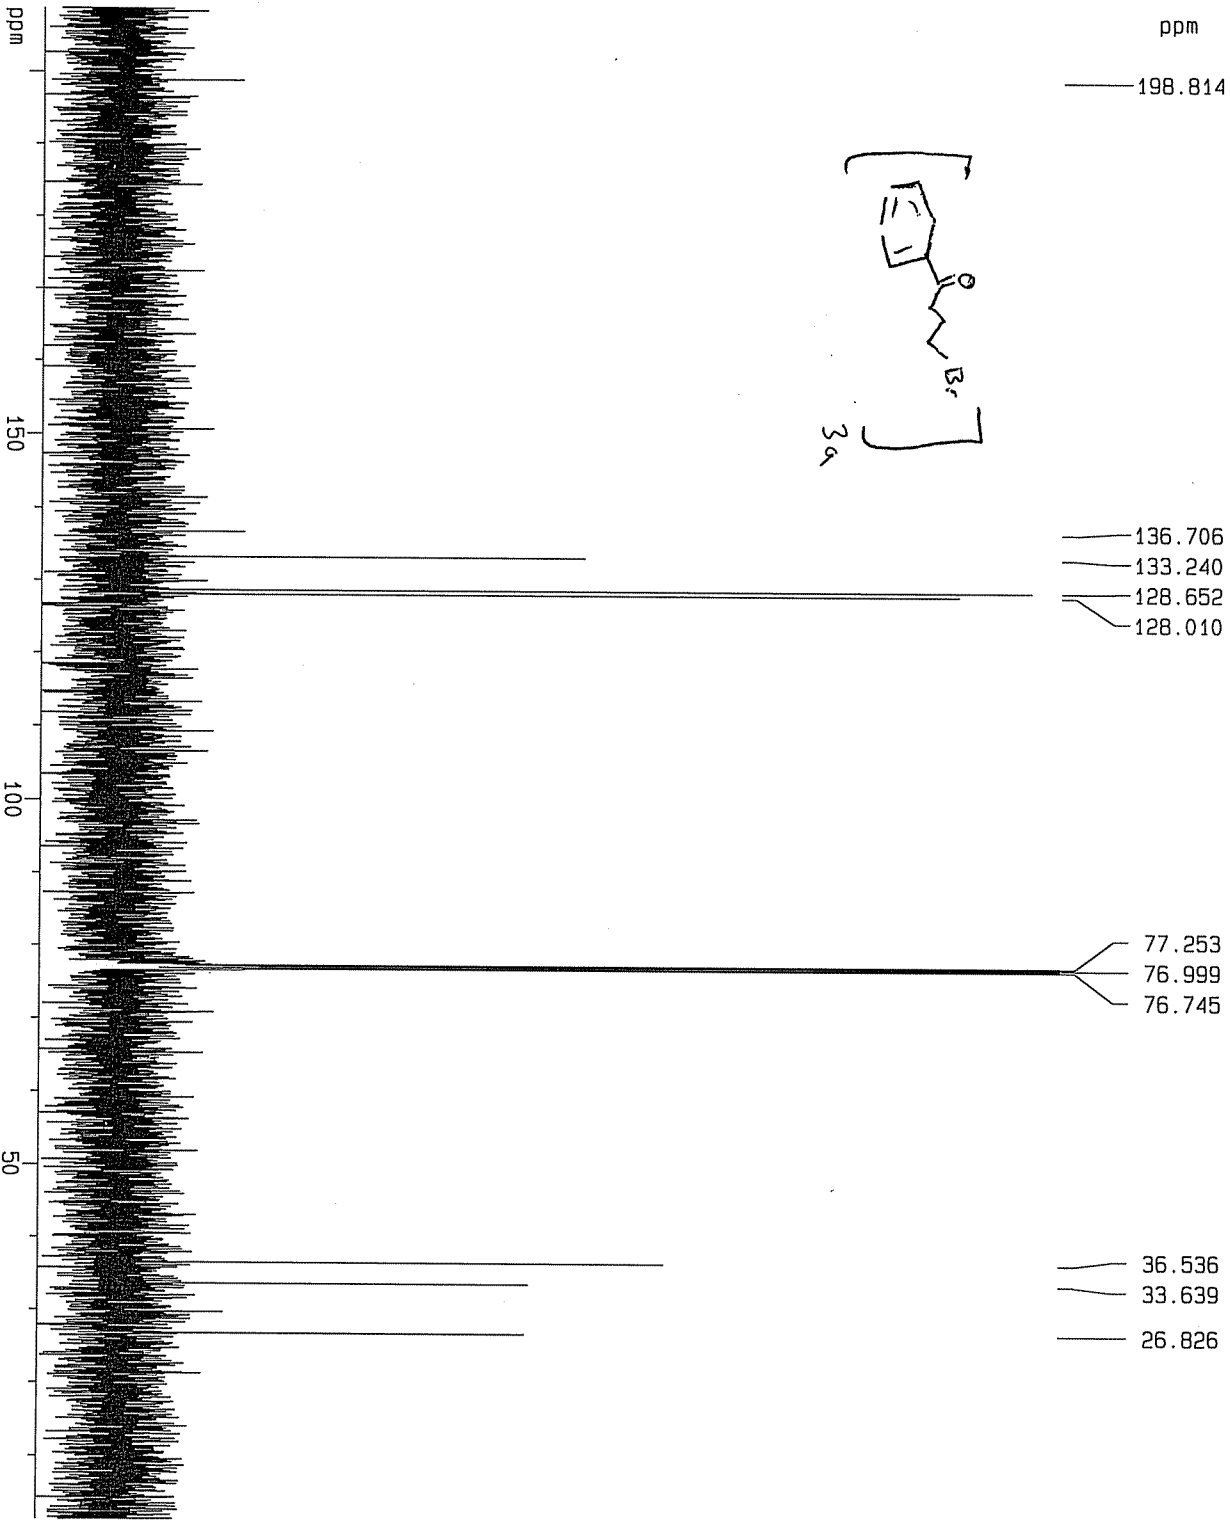

Current Data Parameters  
 NAME 4-Br-PhBut-050408  
 EXPNO 1  
 PROCNO 1

F2 - Acquisition Parameters  
 Date\_ 20080604  
 Time 11.37

INSTRUM spect  
 PROBHD 5 mm PHB80 B8-  
 PULPROG zgpg

TD 65536  
 SOLVENT CDCl3  
 NS 256

DS 0  
 SWH 30030.029 HZ  
 FIDRES 0.458222 HZ

RG 1.0912410 sec  
 RG 1625.5  
 DW 16.650 usec

DE 7.00 usec  
 TE 295.5 K

D1 2.00000000 sec  
 d11 0.03000000 sec  
 MCOREST 0.00000000 sec  
 MCMRK 0.01500000 sec

==== CHANNEL f1 =====  
 NUC1 13C  
 P1 5.00 usec  
 PL1 -1.00 dB  
 SF01 125.7715390 MHz

==== CHANNEL f2 =====  
 CPDPRG2 waltz16  
 NUC2 1H  
 PCPD2 140.00 usec  
 PL2 17.50 dB  
 PL12 17.00 dB  
 SF02 500.1325000 MHz

F2 - Processing Parameters  
 SI 65536  
 SF 125.7577930 MHz  
 WDM EM  
 SSB 0  
 LB 1.00 HZ  
 GB 0  
 PC 1.40

1D NMR plot parameters  
 CX 20.00 cm  
 CY 12.50 cm  
 F1P 208.895 ppm  
 F1 26270.16 HZ  
 F2P 1.346 ppm  
 F2 169.30 HZ

PPMCM 10.37743 ppm/cm  
 HZCM 1305.04321 HZ/cm

Current Data Parameters  
 NAME 4-Br-pMeOPhBut-061606  
 EXPNO 2  
 PROCNO 1

F2 - Acquisition Parameters

Date\_ 20080616  
 Time 14.46  
 INSTRUM spect  
 PROBRD 5 mm PHB80 BB-  
 PULPROG zg30  
 TD 32768  
 SOLVENT CDCl3  
 NS 8  
 DS 0  
 SWH 7507.507 Hz  
 FIDRES 0.229111 Hz  
 AQ 2.1824653 sec  
 RG 912.3  
 DW 66.600 usec  
 DE 7.00 usec  
 TE 296.1 K  
 D1 1.00000000 sec  
 MCREST 0.00000000 sec  
 MCMRK 0.01500000 sec

==== CHANNEL f1 =====  
 NUC1 1H  
 P1 8.30 usec  
 PL1 1.00 dB  
 SFO1 500.1323989 MHz

F2 - Processing parameters  
 SI 32768  
 SF 500.1300225 MHz  
 WDW EM  
 SSB 0  
 LB 0.20 Hz  
 GB 0  
 PC 4.00

1D NMR plot parameters  
 CX 20.00 cm  
 CY 0.00 cm  
 F1P 8.137 ppm  
 F1 4069.80 Hz  
 F2P 2.161 ppm  
 F2 1080.94 Hz  
 PPMCM 0.29881 ppm/cm  
 HZCM 149.44272 Hz/cm

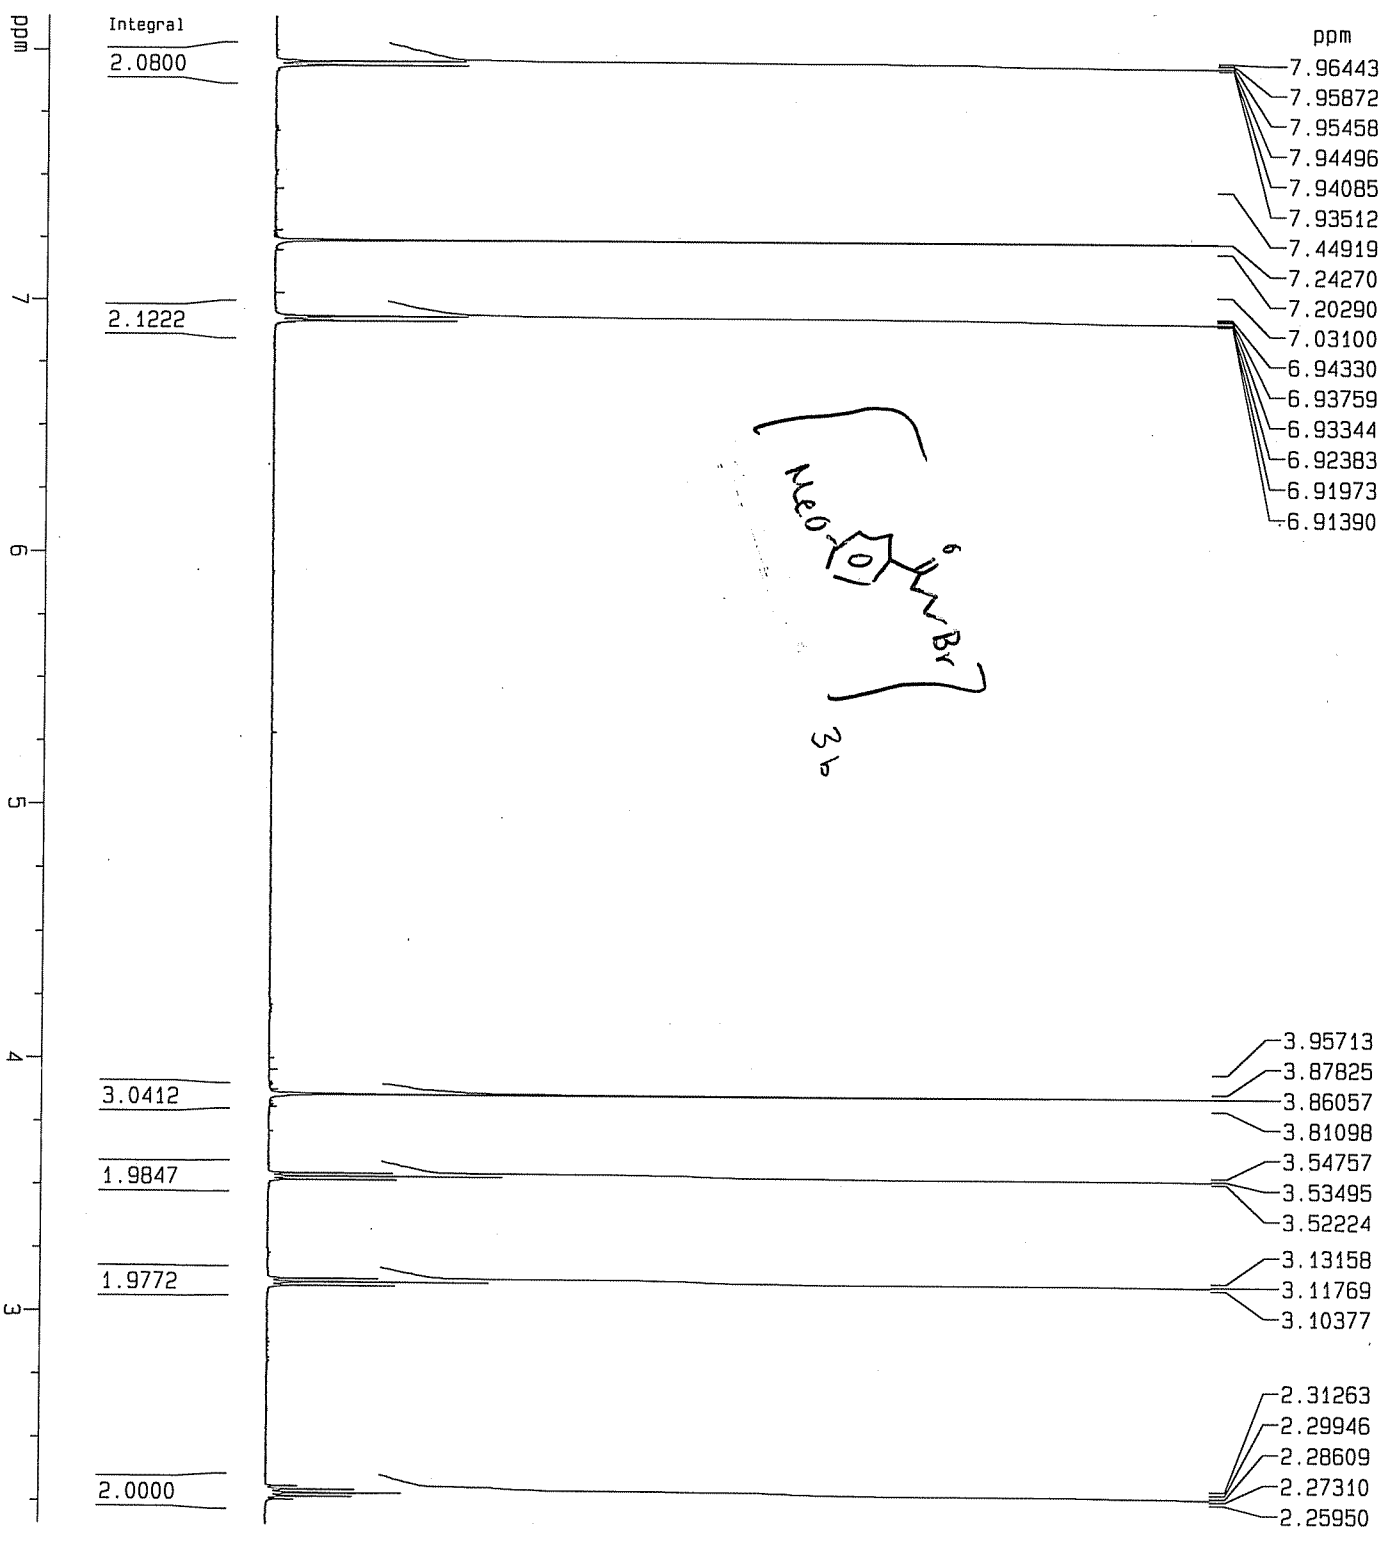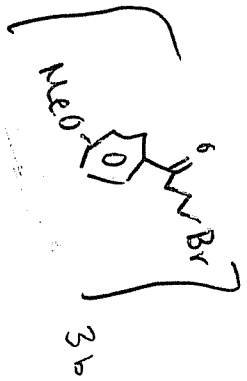

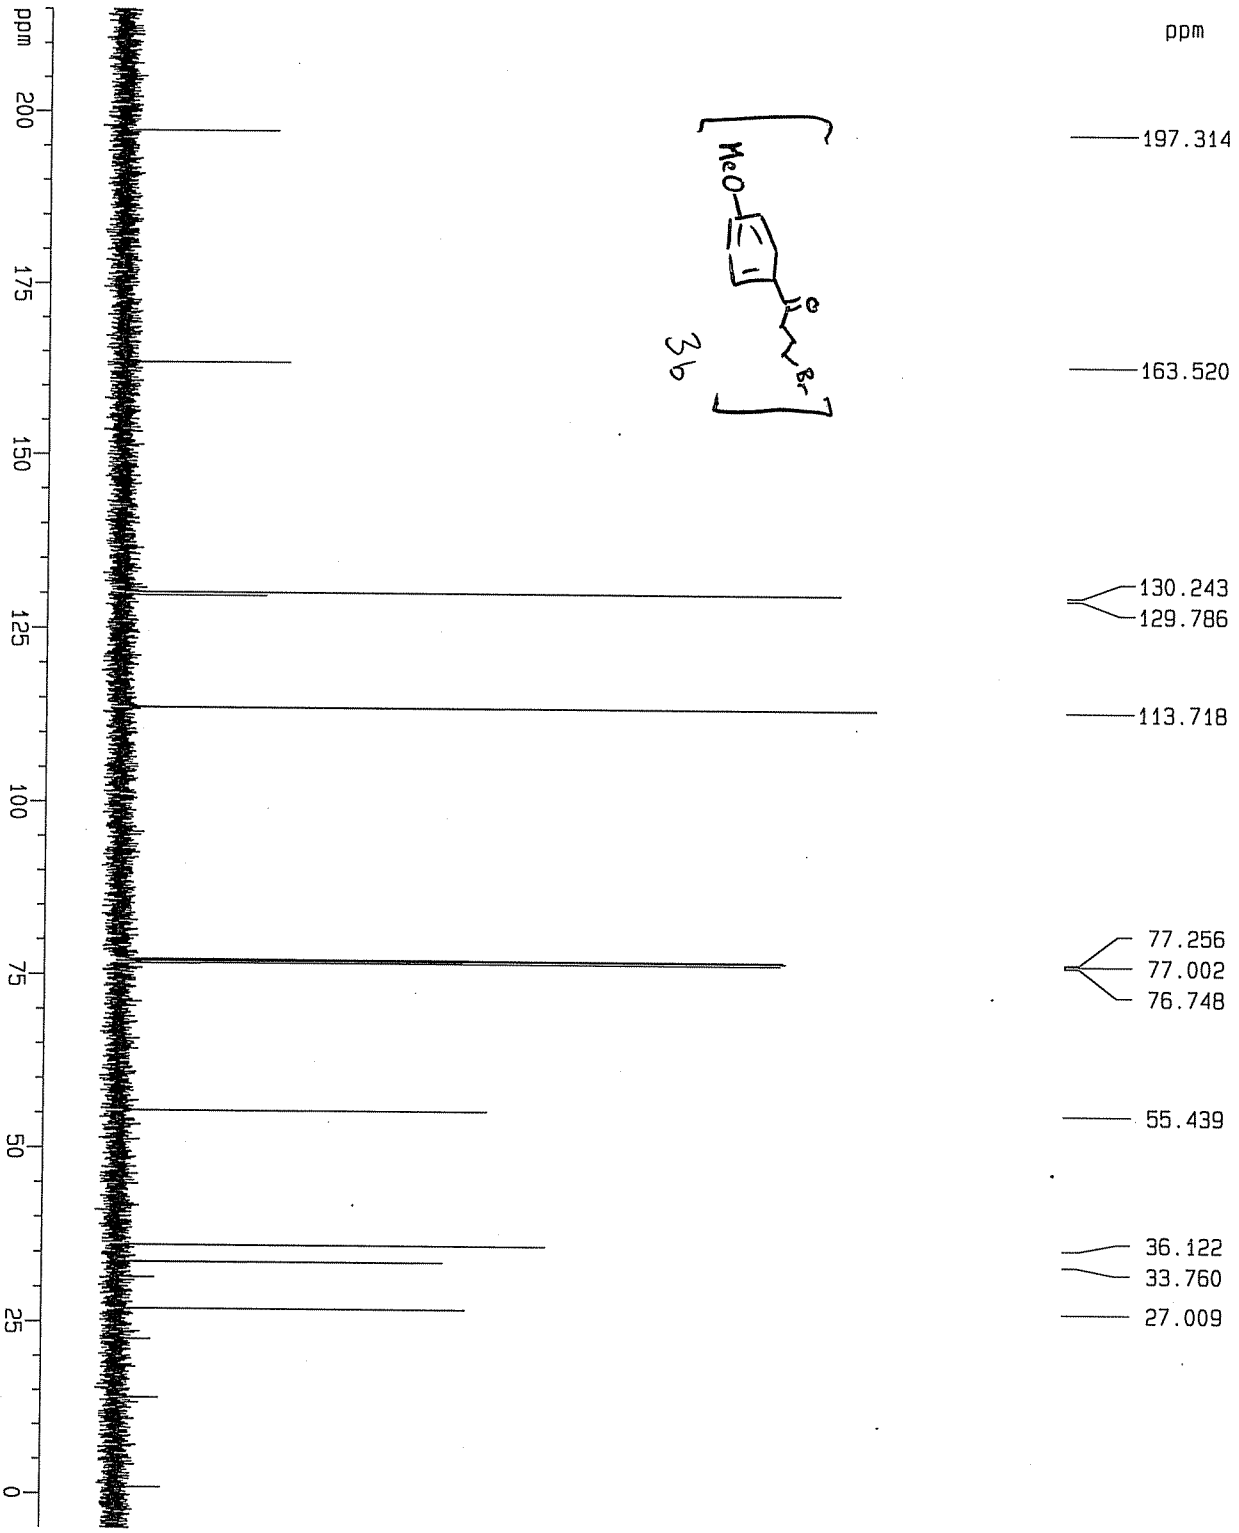

ppm

197.314  
 163.520  
 130.243  
 129.786  
 113.718  
 77.256  
 77.002  
 76.748  
 55.439  
 36.122  
 33.760  
 27.009

Current Data Parameters  
 NAME 4-Br-methoxybut-061808  
 EXPNO 3  
 PROCNO 1

F2 - Acquisition Parameters  
 Date\_ 20080616  
 Time 17.58  
 INSTRUM spect  
 PROBD 5 mm PHEB0 9B-  
 PULPROG zgpg30  
 TD 65536  
 SOLVENT CDCl3  
 NS 37  
 DS 0  
 SMH 30030.029 Hz  
 FIDRES 0.458222 Hz  
 AQ 1.0912410 sec  
 RG 2048  
 DW 16.650 usec  
 DE 7.00 usec  
 TE 296.9 K  
 D1 1.00000000 sec  
 d11 0.03000000 sec  
 MCREST 0.00000000 sec  
 MCMRK 0.01500000 sec

==== CHANNEL f1 =====  
 NUC1 13C  
 P1 9.30 usec  
 PL1 1.00 dB  
 SF01 125.7715390 MHz

==== CHANNEL f2 =====  
 CPDPRG2 waltz16  
 NUC2 1H  
 P2 100.00 usec  
 PL2 17.50 dB  
 PL12 17.50 dB  
 SF02 500.1325000 MHz

F2 - Processing parameters  
 SI 65536  
 SF 125.7577976 MHz  
 WDW EM  
 SSB 0  
 LB 1.00 Hz  
 GB 0  
 PC 1.40

1D NMR plot parameters  
 CX 20.00 cm  
 CY 10.00 cm  
 F1P 215.000 ppm  
 F1 27037.93 Hz  
 F2P -5.000 ppm  
 F2 -628.79 Hz  
 PPMCKM 11.00000 ppm/cm  
 HZCM 1383.33582 Hz/cm



Column

8.02  
8.01  
8.01  
8.00

7.16  
7.14  
7.12

3.56  
3.55  
3.54

3.17  
3.16  
3.15

2.38  
2.32  
2.31  
2.28  
2.28

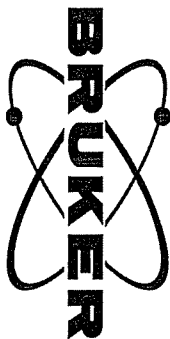

Current Data Parameters  
NAME 4-Br-Pf-PhBut-090808  
EXPNO 3  
PROCNO 1

F2 - Acquisition Parameters  
Date\_ 20080909  
Time\_ 11.47  
INSTRUM spect  
PROBHD 5 mm BBO BB-1H  
PULPROG zg30  
TD 32768  
SOLVENT CDCl3  
NS 6  
DS 0  
SWH 6009.615 Hz  
FIDRES 0.183399 Hz  
AQ 2.7264309 sec  
RG 128  
DW 83.200 usec  
DE 6.00 usec  
TE 296.3 K  
D1 1.0000000 sec  
TD0 1

==== CHANNEL f1 =====  
NUC1 1H  
P1 7.35 usec  
PL1 1.00 dB  
SFO1 500.1327510 MHz  
F2 - Processing parameters  
SI 32768  
SF 500.1300102 MHz  
WDW EM  
SSB 0  
LB 0.30 Hz  
GB 0  
PC 1.00

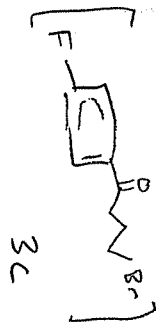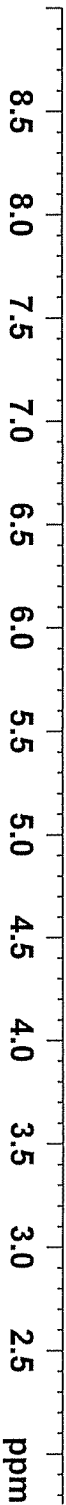

1.96

1.95

1.99

2.00

2.01

ppm

Column

197.13  
 166.76  
 164.76  
 133.13  
 133.11  
 130.65  
 130.58  
 115.80  
 115.63

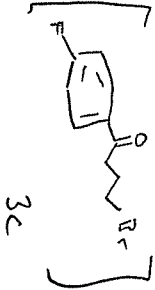

36.41  
 33.53  
 26.74

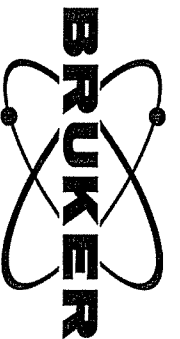

Current Data Parameters  
 NAME 4-Br-pF-PHbUt-090808  
 EXPNO 4  
 PROCNO 1

F2 - Acquisition Parameters  
 Date\_ 20080909  
 Time\_ 11.51  
 INSTRUM spect  
 PROBHD 5 mm BBO BB-1H  
 PULPROG zgpgc30  
 TD 65536  
 SOLVENT CDCl3  
 NS 42  
 DS 4  
 SWH 30030.029 Hz  
 FIDRES 0.458222 Hz  
 AQ 1.0912410 sec  
 RG 3251  
 DW 16.650 usec  
 DE 7.00 usec  
 TE 297.0 K  
 D1 1.00000000 sec  
 d11 0.03000000 sec  
 TD0 1

==== CHANNEL f1 =====  
 NUC1 13C  
 P1 5.00 usec  
 PL1 1.00 dB  
 SFO1 125.7703640 MHz  
 ===== CHANNEL f2 =====  
 CPDPRG2 waltz16  
 NUC2 1H  
 PCPD2 90.00 usec  
 PL2 24.00 dB  
 PL12 24.00 dB  
 SFO2 500.1322150 MHz  
 F2 - Processing parameters  
 SI 32768  
 SF 125.7577962 MHz  
 WDW EM  
 SSB 0  
 IB 1.00 Hz  
 GB 0  
 PC 1.40

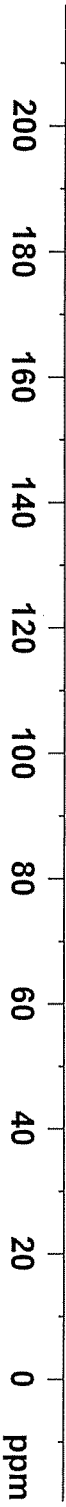

Supplement: NIHMS213708-supplement-supporting_info.pdf [file NIHMS213708-supplement-supporting_info.pdf]
